# Supplementary material for: Transcriptomic Data Analyses Reveal a Reprogramed Lipid Metabolism in HCV-Derived Hepatocellular Cancer
Source: Front Cell Dev Biol. 2020 Oct 27;8:581863. doi: 10.3389/fcell.2020.581863 (PMC7652758; doi:10.3389/fcell.2020.581863)
Supplement: Supplementary Table 2 — List of GO terms enriched by the DEGs in disease samples. [file Table_2.XLSX]

## Sheet: cir
ONTOLOGY	ID	Description	Count	up_down	fraction_count_used	GeneRatio_used	count_used	p.adjust_up	p.adjust_down	p.adjust_min	pathway_tag
BP	GO:0060337	type I interferon signaling pathway	18	18/0	1	18/198	18	2.55607e-15	1	2.55607e-15	up_regulated
BP	GO:0071357	cellular response to type I interferon	18	18/0	1	18/198	18	2.55607e-15	1	2.55607e-15	up_regulated
BP	GO:0034340	response to type I interferon	18	18/0	1	18/198	18	4.82239e-15	1	4.82239e-15	up_regulated
BP	GO:0006952	defense response	64	60/4	0.9375	60/198	60	6.60633e-14	1	6.60633e-14	up_regulated
BP	GO:0019221	cytokine-mediated signaling pathway	40	39/1	0.975	39/198	39	9.58704e-13	1	9.58704e-13	up_regulated
BP	GO:0034097	response to cytokine	49	46/3	0.938776	46/198	46	5.06304e-12	1	5.06304e-12	up_regulated
BP	GO:0071345	cellular response to cytokine stimulus	47	44/3	0.93617	44/198	44	6.34754e-12	1	6.34754e-12	up_regulated
BP	GO:0071346	cellular response to interferon-gamma	19	19/0	1	19/198	19	7.63016e-12	1	7.63016e-12	up_regulated
BP	GO:0006955	immune response	67	64/3	0.955224	64/198	64	9.81511e-12	1	9.81511e-12	up_regulated
BP	GO:0045087	innate immune response	43	41/2	0.953488	41/198	41	9.81511e-12	1	9.81511e-12	up_regulated
BP	GO:0034341	response to interferon-gamma	19	19/0	1	19/198	19	4.1806e-11	1	4.1806e-11	up_regulated
BP	GO:0007166	cell surface receptor signaling pathway	80	76/4	0.95	76/198	76	4.8494e-11	1	4.8494e-11	up_regulated
BP	GO:0009615	response to virus	24	23/1	0.958333	23/198	23	5.76945e-11	1	5.76945e-11	up_regulated
BP	GO:0051607	defense response to virus	21	20/1	0.952381	20/198	20	5.9813e-11	1	5.9813e-11	up_regulated
BP	GO:0051707	response to other organism	39	37/2	0.948718	37/198	37	3.29066e-10	1	3.29066e-10	up_regulated
BP	GO:0043207	response to external biotic stimulus	39	37/2	0.948718	37/198	37	3.29276e-10	1	3.29276e-10	up_regulated
BP	GO:0060333	interferon-gamma-mediated signaling pathway	13	13/0	1	13/198	13	1.09998e-09	1	1.09998e-09	up_regulated
BP	GO:0009607	response to biotic stimulus	39	37/2	0.948718	37/198	37	1.20788e-09	1	1.20788e-09	up_regulated
CC	GO:0009986	cell surface	36	33/3	0.916667	33/209	33	3.17003e-09	1	3.17003e-09	up_regulated
BP	GO:0002376	immune system process	76	72/4	0.947368	72/198	72	3.24886e-09	1	3.24886e-09	up_regulated
BP	GO:0071310	cellular response to organic substance	71	66/5	0.929577	66/198	66	3.80682e-09	1	3.80682e-09	up_regulated
BP	GO:0098542	defense response to other organism	27	26/1	0.962963	26/198	26	7.21861e-09	1	7.21861e-09	up_regulated
BP	GO:0007155	cell adhesion	47	43/4	0.914894	43/198	43	1.30116e-08	1	1.30116e-08	up_regulated
BP	GO:0022610	biological adhesion	47	43/4	0.914894	43/198	43	1.49857e-08	1	1.49857e-08	up_regulated
BP	GO:0045071	negative regulation of viral genome replication	10	10/0	1	10/198	10	1.7744e-08	1	1.7744e-08	up_regulated
BP	GO:0048525	negative regulation of viral process	12	12/0	1	12/198	12	2.47818e-08	1	2.47818e-08	up_regulated
BP	GO:0030155	regulation of cell adhesion	28	28/0	1	28/198	28	3.43009e-08	1	3.43009e-08	up_regulated
BP	GO:1903901	negative regulation of viral life cycle	11	11/0	1	11/198	11	4.16176e-08	1	4.16176e-08	up_regulated
CC	GO:0098552	side of membrane	25	24/1	0.96	24/209	24	9.54246e-08	1	9.54246e-08	up_regulated
BP	GO:0098609	cell-cell adhesion	33	30/3	0.909091	30/198	30	1.11107e-07	1	1.11107e-07	up_regulated
BP	GO:0070887	cellular response to chemical stimulus	79	70/9	0.886076	70/198	70	1.12423e-07	1	1.12423e-07	up_regulated
BP	GO:1903900	regulation of viral life cycle	13	13/0	1	13/198	13	1.38886e-07	1	1.38886e-07	up_regulated
BP	GO:0010033	response to organic substance	77	70/7	0.909091	70/198	70	1.88618e-07	1	1.88618e-07	up_regulated
CC	GO:0042611	MHC protein complex	7	7/0	1	7/209	7	2.20179e-07	1	2.20179e-07	up_regulated
BP	GO:0009605	response to external stimulus	62	56/6	0.903226	56/198	56	2.56399e-07	1	2.56399e-07	up_regulated
BP	GO:0002252	immune effector process	39	37/2	0.948718	37/198	37	4.5426e-07	1	4.5426e-07	up_regulated
MF	GO:0042605	peptide antigen binding	8	7/1	0.875	7/197	7	4.96043e-07	1	4.96043e-07	up_regulated
CC	GO:0071556	integral component of lumenal side of endoplasmic reticulum membrane	7	7/0	1	7/209	7	6.00048e-07	1	6.00048e-07	up_regulated
CC	GO:0098553	lumenal side of endoplasmic reticulum membrane	7	7/0	1	7/209	7	6.00048e-07	1	6.00048e-07	up_regulated
BP	GO:0001768	establishment of T cell polarity	5	5/0	1	5/198	5	9.51888e-07	1	9.51888e-07	up_regulated
BP	GO:0050792	regulation of viral process	14	14/0	1	14/198	14	1.06115e-06	1	1.06115e-06	up_regulated
BP	GO:0051704	multi-organism process	61	57/4	0.934426	57/198	57	1.14101e-06	1	1.14101e-06	up_regulated
BP	GO:0045069	regulation of viral genome replication	10	10/0	1	10/198	10	1.15538e-06	1	1.15538e-06	up_regulated
BP	GO:0001767	establishment of lymphocyte polarity	5	5/0	1	5/198	5	1.57204e-06	1	1.57204e-06	up_regulated
BP	GO:0022407	regulation of cell-cell adhesion	19	19/0	1	19/198	19	1.69909e-06	1	1.69909e-06	up_regulated
BP	GO:0050863	regulation of T cell activation	17	17/0	1	17/198	17	2.72409e-06	1	2.72409e-06	up_regulated
BP	GO:0001771	immunological synapse formation	5	5/0	1	5/198	5	4.02544e-06	1	4.02544e-06	up_regulated
BP	GO:0043903	regulation of symbiosis, encompassing mutualism through parasitism	14	14/0	1	14/198	14	4.25422e-06	1	4.25422e-06	up_regulated
BP	GO:0051249	regulation of lymphocyte activation	20	20/0	1	20/198	20	4.32543e-06	1	4.32543e-06	up_regulated
BP	GO:0007159	leukocyte cell-cell adhesion	18	17/1	0.944444	17/198	17	4.5983e-06	1	4.5983e-06	up_regulated
BP	GO:0051240	positive regulation of multicellular organismal process	42	41/1	0.97619	41/198	41	7.95307e-06	1	7.95307e-06	up_regulated
BP	GO:0002696	positive regulation of leukocyte activation	17	17/0	1	17/198	17	8.51656e-06	1	8.51656e-06	up_regulated
BP	GO:0043901	negative regulation of multi-organism process	13	12/1	0.923077	12/198	12	9.72665e-06	1	9.72665e-06	up_regulated
BP	GO:0051251	positive regulation of lymphocyte activation	16	16/0	1	16/198	16	9.72665e-06	1	9.72665e-06	up_regulated
BP	GO:0019079	viral genome replication	11	10/1	0.909091	10/198	10	1.14795e-05	1	1.14795e-05	up_regulated
BP	GO:0002684	positive regulation of immune system process	32	32/0	1	32/198	32	1.17346e-05	1	1.17346e-05	up_regulated
BP	GO:0050867	positive regulation of cell activation	17	17/0	1	17/198	17	1.23957e-05	1	1.23957e-05	up_regulated
CC	GO:0044459	plasma membrane part	66	59/7	0.893939	59/209	59	1.32562e-05	1	1.32562e-05	up_regulated
BP	GO:0050870	positive regulation of T cell activation	13	13/0	1	13/198	13	1.37597e-05	1	1.37597e-05	up_regulated
BP	GO:0042110	T cell activation	19	19/0	1	19/198	19	1.89127e-05	1	1.89127e-05	up_regulated
BP	GO:0022409	positive regulation of cell-cell adhesion	14	14/0	1	14/198	14	1.95553e-05	1	1.95553e-05	up_regulated
BP	GO:1903039	positive regulation of leukocyte cell-cell adhesion	13	13/0	1	13/198	13	2.30558e-05	1	2.30558e-05	up_regulated
BP	GO:1903037	regulation of leukocyte cell-cell adhesion	15	15/0	1	15/198	15	2.49238e-05	1	2.49238e-05	up_regulated
BP	GO:0002694	regulation of leukocyte activation	21	20/1	0.952381	20/198	20	2.88469e-05	1	2.88469e-05	up_regulated
BP	GO:0045785	positive regulation of cell adhesion	17	17/0	1	17/198	17	3.10943e-05	1	3.10943e-05	up_regulated
BP	GO:0044419	interspecies interaction between organisms	28	27/1	0.964286	27/198	27	3.3179e-05	1	3.3179e-05	up_regulated
BP	GO:0016032	viral process	26	25/1	0.961538	25/198	25	3.55818e-05	1	3.55818e-05	up_regulated
BP	GO:0044403	symbiont process	27	26/1	0.962963	26/198	26	4.07127e-05	1	4.07127e-05	up_regulated
CC	GO:0009897	external side of plasma membrane	15	14/1	0.933333	14/209	14	6.1371e-05	1	6.1371e-05	up_regulated
BP	GO:0051336	regulation of hydrolase activity	38	33/5	0.868421	33/198	33	6.44631e-05	1	6.44631e-05	up_regulated
BP	GO:0002682	regulation of immune system process	39	38/1	0.974359	38/198	38	6.76219e-05	1	6.76219e-05	up_regulated
BP	GO:0006950	response to stress	77	72/5	0.935065	72/198	72	7.23962e-05	1	7.23962e-05	up_regulated
BP	GO:0050865	regulation of cell activation	21	20/1	0.952381	20/198	20	7.23962e-05	1	7.23962e-05	up_regulated
CC	GO:0012507	ER to Golgi transport vesicle membrane	7	7/0	1	7/209	7	7.29225e-05	1	7.29225e-05	up_regulated
BP	GO:0050900	leukocyte migration	18	18/0	1	18/198	18	7.6403e-05	1	7.6403e-05	up_regulated
CC	GO:0030176	integral component of endoplasmic reticulum membrane	11	10/1	0.909091	10/209	10	8.07153e-05	1	8.07153e-05	up_regulated
BP	GO:0019882	antigen processing and presentation	13	12/1	0.923077	12/198	12	9.35707e-05	1	9.35707e-05	up_regulated
CC	GO:0031227	intrinsic component of endoplasmic reticulum membrane	11	10/1	0.909091	10/209	10	9.96148e-05	1	9.96148e-05	up_regulated
MF	GO:0003725	double-stranded RNA binding	7	7/0	1	7/197	7	0.000106576	1	0.000106576	up_regulated
BP	GO:0046649	lymphocyte activation	22	22/0	1	22/198	22	0.000111975	1	0.000111975	up_regulated
BP	GO:0002687	positive regulation of leukocyte migration	9	9/0	1	9/198	9	0.000118499	1	0.000118499	up_regulated
CC	GO:0045335	phagocytic vesicle	9	9/0	1	9/209	9	0.000122529	1	0.000122529	up_regulated
BP	GO:0036336	dendritic cell migration	5	5/0	1	5/198	5	0.000125835	1	0.000125835	up_regulated
MF	GO:0003823	antigen binding	12	11/1	0.916667	11/197	11	0.000145674	1	0.000145674	up_regulated
BP	GO:0019058	viral life cycle	15	14/1	0.933333	14/198	14	0.000150517	1	0.000150517	up_regulated
CC	GO:0030666	endocytic vesicle membrane	10	10/0	1	10/209	10	0.000150517	1	0.000150517	up_regulated
BP	GO:0001816	cytokine production	23	22/1	0.956522	22/198	22	0.000160881	1	0.000160881	up_regulated
CC	GO:0030670	phagocytic vesicle membrane	7	7/0	1	7/209	7	0.000167138	1	0.000167138	up_regulated
BP	GO:0001819	positive regulation of cytokine production	16	16/0	1	16/198	16	0.000176267	1	0.000176267	up_regulated
BP	GO:2000107	negative regulation of leukocyte apoptotic process	6	6/0	1	6/198	6	0.000179867	1	0.000179867	up_regulated
BP	GO:0048584	positive regulation of response to stimulus	49	48/1	0.979592	48/198	48	0.000180147	1	0.000180147	up_regulated
BP	GO:0090023	positive regulation of neutrophil chemotaxis	5	5/0	1	5/198	5	0.000194995	1	0.000194995	up_regulated
BP	GO:0071887	leukocyte apoptotic process	8	8/0	1	8/198	8	0.00019513	1	0.00019513	up_regulated
BP	GO:0050707	regulation of cytokine secretion	10	10/0	1	10/198	10	0.000248198	1	0.000248198	up_regulated
BP	GO:0071624	positive regulation of granulocyte chemotaxis	5	5/0	1	5/198	5	0.000262032	1	0.000262032	up_regulated
CC	GO:0031012	extracellular matrix	17	17/0	1	17/209	17	0.000282141	1	0.000282141	up_regulated
BP	GO:1902533	positive regulation of intracellular signal transduction	28	27/1	0.964286	27/198	27	0.000282369	1	0.000282369	up_regulated
BP	GO:1902624	positive regulation of neutrophil migration	5	5/0	1	5/198	5	0.000296658	1	0.000296658	up_regulated
BP	GO:0002577	regulation of antigen processing and presentation	4	4/0	1	4/198	4	0.000308466	1	0.000308466	up_regulated
BP	GO:0043900	regulation of multi-organism process	16	15/1	0.9375	15/198	15	0.000343056	1	0.000343056	up_regulated
BP	GO:0001817	regulation of cytokine production	21	20/1	0.952381	20/198	20	0.000344576	1	0.000344576	up_regulated
BP	GO:0070098	chemokine-mediated signaling pathway	7	7/0	1	7/198	7	0.000344576	1	0.000344576	up_regulated
MF	GO:0005102	signaling receptor binding	36	36/0	1	36/197	36	0.000345418	1	0.000345418	up_regulated
CC	GO:0030660	Golgi-associated vesicle membrane	8	8/0	1	8/209	8	0.000359851	1	0.000359851	up_regulated
BP	GO:0016477	cell migration	36	34/2	0.944444	34/198	34	0.000370594	1	0.000370594	up_regulated
BP	GO:0090022	regulation of neutrophil chemotaxis	5	5/0	1	5/198	5	0.000370594	1	0.000370594	up_regulated
BP	GO:2000106	regulation of leukocyte apoptotic process	7	7/0	1	7/198	7	0.000384025	1	0.000384025	up_regulated
CC	GO:0005615	extracellular space	82	70/12	0.853659	70/209	70	0.000387048	1	0.000387048	up_regulated
BP	GO:0030217	T cell differentiation	11	11/0	1	11/198	11	0.000417892	1	0.000417892	up_regulated
CC	GO:0031982	vesicle	87	74/13	0.850575	74/209	74	0.000454936	1	0.000454936	up_regulated
BP	GO:0030593	neutrophil chemotaxis	7	7/0	1	7/198	7	0.000496633	1	0.000496633	up_regulated
BP	GO:0050776	regulation of immune response	27	27/0	1	27/198	27	0.000496633	1	0.000496633	up_regulated
BP	GO:0001655	urogenital system development	13	13/0	1	13/198	13	0.000501242	1	0.000501242	up_regulated
BP	GO:1902622	regulation of neutrophil migration	5	5/0	1	5/198	5	0.000515371	1	0.000515371	up_regulated
BP	GO:0035455	response to interferon-alpha	4	4/0	1	4/198	4	0.00052651	1	0.00052651	up_regulated
CC	GO:0070062	extracellular exosome	62	53/9	0.854839	53/209	53	0.000538328	1	0.000538328	up_regulated
CC	GO:0030134	COPII-coated ER to Golgi transport vesicle	8	7/1	0.875	7/209	7	0.000538328	1	0.000538328	up_regulated
MF	GO:1901681	sulfur compound binding	14	11/3	0.785714	11/197	11	0.000575377	1	0.000575377	up_regulated
BP	GO:0042221	response to chemical	88	77/11	0.875	77/198	77	0.000577842	1	0.000577842	up_regulated
BP	GO:0050663	cytokine secretion	10	10/0	1	10/198	10	0.000583596	1	0.000583596	up_regulated
MF	GO:0008201	heparin binding	12	9/3	0.75	9/197	9	0.000583596	1	0.000583596	up_regulated
BP	GO:0022408	negative regulation of cell-cell adhesion	9	9/0	1	9/198	9	0.000601164	1	0.000601164	up_regulated
CC	GO:1903561	extracellular vesicle	62	53/9	0.854839	53/209	53	0.000618584	1	0.000618584	up_regulated
CC	GO:0043230	extracellular organelle	62	53/9	0.854839	53/209	53	0.000625202	1	0.000625202	up_regulated
BP	GO:0050851	antigen receptor-mediated signaling pathway	12	12/0	1	12/198	12	0.000633777	1	0.000633777	up_regulated
BP	GO:0061326	renal tubule development	7	7/0	1	7/198	7	0.000670682	1	0.000670682	up_regulated
BP	GO:0050920	regulation of chemotaxis	10	10/0	1	10/198	10	0.00070883	1	0.00070883	up_regulated
MF	GO:0042379	chemokine receptor binding	6	6/0	1	6/197	6	0.00070883	1	0.00070883	up_regulated
BP	GO:0032103	positive regulation of response to external stimulus	12	12/0	1	12/198	12	0.000774454	1	0.000774454	up_regulated
CC	GO:0030139	endocytic vesicle	12	12/0	1	12/209	12	0.000776666	1	0.000776666	up_regulated
BP	GO:0050921	positive regulation of chemotaxis	8	8/0	1	8/198	8	0.000785644	1	0.000785644	up_regulated
BP	GO:0048870	cell motility	37	35/2	0.945946	35/198	35	0.000789459	1	0.000789459	up_regulated
BP	GO:0051674	localization of cell	37	35/2	0.945946	35/198	35	0.000789459	1	0.000789459	up_regulated
BP	GO:0043123	positive regulation of I-kappaB kinase/NF-kappaB signaling	9	9/0	1	9/198	9	0.000797371	1	0.000797371	up_regulated
BP	GO:0002407	dendritic cell chemotaxis	4	4/0	1	4/198	4	0.000798404	1	0.000798404	up_regulated
BP	GO:2000116	regulation of cysteine-type endopeptidase activity	12	11/1	0.916667	11/198	11	0.000829076	1	0.000829076	up_regulated
BP	GO:0030335	positive regulation of cell migration	17	16/1	0.941176	16/198	16	0.000840347	1	0.000840347	up_regulated
BP	GO:1990266	neutrophil migration	7	7/0	1	7/198	7	0.000849649	1	0.000849649	up_regulated
CC	GO:0044421	extracellular region part	83	71/12	0.855422	71/209	71	0.000887721	1	0.000887721	up_regulated
CC	GO:0030662	coated vesicle membrane	9	9/0	1	9/209	9	0.00089605	1	0.00089605	up_regulated
BP	GO:0051239	regulation of multicellular organismal process	58	54/4	0.931034	54/198	54	0.000923671	1	0.000923671	up_regulated
BP	GO:0007162	negative regulation of cell adhesion	11	11/0	1	11/198	11	0.000978727	1	0.000978727	up_regulated
BP	GO:0032609	interferon-gamma production	7	7/0	1	7/198	7	0.000988792	1	0.000988792	up_regulated
CC	GO:0005798	Golgi-associated vesicle	10	9/1	0.9	9/209	9	0.000993641	1	0.000993641	up_regulated
BP	GO:0002478	antigen processing and presentation of exogenous peptide antigen	9	9/0	1	9/198	9	0.00100312	1	0.00100312	up_regulated
BP	GO:0097048	dendritic cell apoptotic process	3	3/0	1	3/198	3	0.00100312	1	0.00100312	up_regulated
BP	GO:2000668	regulation of dendritic cell apoptotic process	3	3/0	1	3/198	3	0.00100312	1	0.00100312	up_regulated
MF	GO:0005539	glycosaminoglycan binding	13	10/3	0.769231	10/197	10	0.0010298	1	0.0010298	up_regulated
BP	GO:0043281	regulation of cysteine-type endopeptidase activity involved in apoptotic process	11	10/1	0.909091	10/198	10	0.00105123	1	0.00105123	up_regulated
BP	GO:0045582	positive regulation of T cell differentiation	6	6/0	1	6/198	6	0.00105123	1	0.00105123	up_regulated
BP	GO:0002685	regulation of leukocyte migration	9	9/0	1	9/198	9	0.00105298	1	0.00105298	up_regulated
BP	GO:0002250	adaptive immune response	18	17/1	0.944444	17/198	17	0.0010563	1	0.0010563	up_regulated
BP	GO:2000147	positive regulation of cell motility	17	16/1	0.941176	16/198	16	0.00107487	1	0.00107487	up_regulated
BP	GO:0071622	regulation of granulocyte chemotaxis	5	5/0	1	5/198	5	0.00107487	1	0.00107487	up_regulated
BP	GO:0097529	myeloid leukocyte migration	9	9/0	1	9/198	9	0.00107487	1	0.00107487	up_regulated
BP	GO:0071621	granulocyte chemotaxis	7	7/0	1	7/198	7	0.00108604	1	0.00108604	up_regulated
BP	GO:0051094	positive regulation of developmental process	31	30/1	0.967742	30/198	30	0.00109933	1	0.00109933	up_regulated
BP	GO:0002479	antigen processing and presentation of exogenous peptide antigen via MHC class I, TAP-dependent	6	6/0	1	6/198	6	0.00115882	1	0.00115882	up_regulated
BP	GO:0008283	cell proliferation	43	41/2	0.953488	41/198	41	0.00121683	1	0.00121683	up_regulated
BP	GO:2000145	regulation of cell motility	24	23/1	0.958333	23/198	23	0.00122194	1	0.00122194	up_regulated
BP	GO:0019884	antigen processing and presentation of exogenous antigen	9	9/0	1	9/198	9	0.00122194	1	0.00122194	up_regulated
BP	GO:0050790	regulation of catalytic activity	49	44/5	0.897959	44/198	44	0.00122629	1	0.00122629	up_regulated
BP	GO:0019883	antigen processing and presentation of endogenous antigen	3	3/0	1	3/198	3	0.00122629	1	0.00122629	up_regulated
BP	GO:0031529	ruffle organization	5	5/0	1	5/198	5	0.00122629	1	0.00122629	up_regulated
BP	GO:0043122	regulation of I-kappaB kinase/NF-kappaB signaling	10	10/0	1	10/198	10	0.00122629	1	0.00122629	up_regulated
MF	GO:0008009	chemokine activity	5	5/0	1	5/197	5	0.00122629	1	0.00122629	up_regulated
MF	GO:0070566	adenylyltransferase activity	4	4/0	1	4/197	4	0.00123914	1	0.00123914	up_regulated
BP	GO:0031295	T cell costimulation	6	6/0	1	6/198	6	0.00125969	1	0.00125969	up_regulated
BP	GO:0051272	positive regulation of cellular component movement	17	16/1	0.941176	16/198	16	0.00131301	1	0.00131301	up_regulated
BP	GO:0030334	regulation of cell migration	23	22/1	0.956522	22/198	22	0.00131301	1	0.00131301	up_regulated
BP	GO:0040012	regulation of locomotion	25	24/1	0.96	24/198	24	0.00131301	1	0.00131301	up_regulated
BP	GO:0031294	lymphocyte costimulation	6	6/0	1	6/198	6	0.00131301	1	0.00131301	up_regulated
BP	GO:0042590	antigen processing and presentation of exogenous peptide antigen via MHC class I	6	6/0	1	6/198	6	0.00131301	1	0.00131301	up_regulated
BP	GO:0052548	regulation of endopeptidase activity	16	14/2	0.875	14/198	14	0.00134365	1	0.00134365	up_regulated
BP	GO:0071674	mononuclear cell migration	6	6/0	1	6/198	6	0.00138383	1	0.00138383	up_regulated
CC	GO:0098797	plasma membrane protein complex	18	17/1	0.944444	17/209	17	0.00138383	1	0.00138383	up_regulated
BP	GO:0008037	cell recognition	10	9/1	0.9	9/198	9	0.0014046	1	0.0014046	up_regulated
BP	GO:0048002	antigen processing and presentation of peptide antigen	10	9/1	0.9	9/198	9	0.0014046	1	0.0014046	up_regulated
BP	GO:0051270	regulation of cellular component movement	25	24/1	0.96	24/198	24	0.00150074	1	0.00150074	up_regulated
CC	GO:0030135	coated vesicle	12	11/1	0.916667	11/209	11	0.00150074	1	0.00150074	up_regulated
BP	GO:0040011	locomotion	39	37/2	0.948718	37/198	37	0.00170888	1	0.00170888	up_regulated
BP	GO:0072001	renal system development	11	11/0	1	11/198	11	0.00171048	1	0.00171048	up_regulated
BP	GO:0032069	regulation of nuclease activity	4	4/0	1	4/198	4	0.00171432	1	0.00171432	up_regulated
BP	GO:0070371	ERK1 and ERK2 cascade	13	12/1	0.923077	12/198	12	0.00172678	1	0.00172678	up_regulated
BP	GO:0040017	positive regulation of locomotion	17	16/1	0.941176	16/198	16	0.00172678	1	0.00172678	up_regulated
BP	GO:0090183	regulation of kidney development	5	5/0	1	5/198	5	0.00172678	1	0.00172678	up_regulated
BP	GO:0045621	positive regulation of lymphocyte differentiation	6	6/0	1	6/198	6	0.00181849	1	0.00181849	up_regulated
BP	GO:0097530	granulocyte migration	7	7/0	1	7/198	7	0.00194448	1	0.00194448	up_regulated
BP	GO:0050778	positive regulation of immune response	21	21/0	1	21/198	21	0.00197421	1	0.00197421	up_regulated
BP	GO:0006954	inflammatory response	22	20/2	0.909091	20/198	20	0.00199831	1	0.00199831	up_regulated
BP	GO:0050852	T cell receptor signaling pathway	9	9/0	1	9/198	9	0.00214011	1	0.00214011	up_regulated
BP	GO:0002690	positive regulation of leukocyte chemotaxis	6	6/0	1	6/198	6	0.00214011	1	0.00214011	up_regulated
BP	GO:0042127	regulation of cell proliferation	36	34/2	0.944444	34/198	34	0.00216711	1	0.00216711	up_regulated
BP	GO:0010647	positive regulation of cell communication	36	35/1	0.972222	35/198	35	0.00217369	1	0.00217369	up_regulated
BP	GO:0052547	regulation of peptidase activity	17	14/3	0.823529	14/198	14	0.00225017	1	0.00225017	up_regulated
BP	GO:0030595	leukocyte chemotaxis	9	9/0	1	9/198	9	0.00225017	1	0.00225017	up_regulated
BP	GO:0023056	positive regulation of signaling	36	35/1	0.972222	35/198	35	0.00226656	1	0.00226656	up_regulated
BP	GO:0046847	filopodium assembly	5	5/0	1	5/198	5	0.00226656	1	0.00226656	up_regulated
CC	GO:0001772	immunological synapse	4	4/0	1	4/209	4	0.00226656	1	0.00226656	up_regulated
BP	GO:0030198	extracellular matrix organization	12	12/0	1	12/198	12	0.00227443	1	0.00227443	up_regulated
CC	GO:0012506	vesicle membrane	22	20/2	0.909091	20/209	20	0.0023173	1	0.0023173	up_regulated
BP	GO:0002830	positive regulation of type 2 immune response	3	3/0	1	3/198	3	0.00265562	1	0.00265562	up_regulated
BP	GO:0072080	nephron tubule development	6	6/0	1	6/198	6	0.00272916	1	0.00272916	up_regulated
BP	GO:0045580	regulation of T cell differentiation	7	7/0	1	7/198	7	0.00277895	1	0.00277895	up_regulated
BP	GO:0032879	regulation of localization	50	48/2	0.96	48/198	48	0.00285068	1	0.00285068	up_regulated
BP	GO:0007249	I-kappaB kinase/NF-kappaB signaling	10	10/0	1	10/198	10	0.00293615	1	0.00293615	up_regulated
BP	GO:0002548	monocyte chemotaxis	5	5/0	1	5/198	5	0.00294384	1	0.00294384	up_regulated
BP	GO:0002474	antigen processing and presentation of peptide antigen via MHC class I	6	6/0	1	6/198	6	0.00297143	1	0.00297143	up_regulated
BP	GO:0072676	lymphocyte migration	6	6/0	1	6/198	6	0.00297143	1	0.00297143	up_regulated
BP	GO:1903708	positive regulation of hemopoiesis	8	8/0	1	8/198	8	0.00302057	1	0.00302057	up_regulated
BP	GO:0050856	regulation of T cell receptor signaling pathway	4	4/0	1	4/198	4	0.0030324	1	0.0030324	up_regulated
CC	GO:0042613	MHC class II protein complex	3	3/0	1	3/209	3	0.0030602	1	0.0030602	up_regulated
BP	GO:0046651	lymphocyte proliferation	10	10/0	1	10/198	10	0.0031996	1	0.0031996	up_regulated
BP	GO:0032943	mononuclear cell proliferation	10	10/0	1	10/198	10	0.00337736	1	0.00337736	up_regulated
BP	GO:0042098	T cell proliferation	8	8/0	1	8/198	8	0.00343481	1	0.00343481	up_regulated
BP	GO:0070372	regulation of ERK1 and ERK2 cascade	12	11/1	0.916667	11/198	11	0.00344638	1	0.00344638	up_regulated
BP	GO:0009967	positive regulation of signal transduction	33	32/1	0.969697	32/198	32	0.00344638	1	0.00344638	up_regulated
BP	GO:2000026	regulation of multicellular organismal development	39	38/1	0.974359	38/198	38	0.00358392	1	0.00358392	up_regulated
BP	GO:0010559	regulation of glycoprotein biosynthetic process	4	4/0	1	4/198	4	0.00358436	1	0.00358436	up_regulated
BP	GO:0031268	pseudopodium organization	3	3/0	1	3/198	3	0.00358436	1	0.00358436	up_regulated
BP	GO:0051345	positive regulation of hydrolase activity	21	19/2	0.904762	19/198	19	0.00361981	1	0.00361981	up_regulated
BP	GO:0002460	adaptive immune response based on somatic recombination of immune receptors built from immunoglobulin superfamily domains	11	11/0	1	11/198	11	0.00363922	1	0.00363922	up_regulated
BP	GO:0006928	movement of cell or subcellular component	42	39/3	0.928571	39/198	39	0.00373232	1	0.00373232	up_regulated
BP	GO:0072006	nephron development	7	7/0	1	7/198	7	0.00378482	1	0.00378482	up_regulated
CC	GO:0030659	cytoplasmic vesicle membrane	21	19/2	0.904762	19/209	19	0.00386983	1	0.00386983	up_regulated
BP	GO:0070633	transepithelial transport	3	3/0	1	3/198	3	0.0041526	1	0.0041526	up_regulated
BP	GO:0072073	kidney epithelium development	7	7/0	1	7/198	7	0.00424026	1	0.00424026	up_regulated
BP	GO:0060326	cell chemotaxis	10	10/0	1	10/198	10	0.00433345	1	0.00433345	up_regulated
MF	GO:0042277	peptide binding	13	10/3	0.769231	10/197	10	0.00434111	1	0.00434111	up_regulated
BP	GO:0009617	response to bacterium	17	16/1	0.941176	16/198	16	0.00441628	1	0.00441628	up_regulated
CC	GO:0005578	proteinaceous extracellular matrix	12	12/0	1	12/209	12	0.00441628	1	0.00441628	up_regulated
BP	GO:0006935	chemotaxis	16	16/0	1	16/198	16	0.00447497	1	0.00447497	up_regulated
BP	GO:0048583	regulation of response to stimulus	69	67/2	0.971014	67/198	67	0.0044821	1	0.0044821	up_regulated
BP	GO:0042330	taxis	16	16/0	1	16/198	16	0.00451209	1	0.00451209	up_regulated
BP	GO:0070227	lymphocyte apoptotic process	5	5/0	1	5/198	5	0.00451209	1	0.00451209	up_regulated
BP	GO:0010560	positive regulation of glycoprotein biosynthetic process	3	3/0	1	3/198	3	0.00466367	1	0.00466367	up_regulated
BP	GO:0071731	response to nitric oxide	3	3/0	1	3/198	3	0.00466367	1	0.00466367	up_regulated
BP	GO:2001056	positive regulation of cysteine-type endopeptidase activity	8	7/1	0.875	7/198	7	0.00474537	1	0.00474537	up_regulated
BP	GO:0070661	leukocyte proliferation	10	10/0	1	10/198	10	0.00474537	1	0.00474537	up_regulated
BP	GO:0045321	leukocyte activation	28	26/2	0.928571	26/198	26	0.00477977	1	0.00477977	up_regulated
BP	GO:0001101	response to acid chemical	13	11/2	0.846154	11/198	11	0.00488559	1	0.00488559	up_regulated
CC	GO:0055038	recycling endosome membrane	5	5/0	1	5/209	5	0.00490938	1	0.00490938	up_regulated
BP	GO:0032652	regulation of interleukin-1 production	5	5/0	1	5/198	5	0.00494397	1	0.00494397	up_regulated
BP	GO:0030098	lymphocyte differentiation	11	11/0	1	11/198	11	0.00494397	1	0.00494397	up_regulated
BP	GO:0032732	positive regulation of interleukin-1 production	4	4/0	1	4/198	4	0.00514256	1	0.00514256	up_regulated
MF	GO:0048020	CCR chemokine receptor binding	4	4/0	1	4/197	4	0.00514256	1	0.00514256	up_regulated
BP	GO:0009988	cell-cell recognition	6	5/1	0.833333	5/198	5	0.0051855	1	0.0051855	up_regulated
BP	GO:0072009	nephron epithelium development	6	6/0	1	6/198	6	0.00542351	1	0.00542351	up_regulated
BP	GO:0050704	regulation of interleukin-1 secretion	4	4/0	1	4/198	4	0.00552256	1	0.00552256	up_regulated
BP	GO:0042129	regulation of T cell proliferation	7	7/0	1	7/198	7	0.00552555	1	0.00552555	up_regulated
BP	GO:0001775	cell activation	30	28/2	0.933333	28/198	28	0.00556489	1	0.00556489	up_regulated
BP	GO:0070374	positive regulation of ERK1 and ERK2 cascade	10	9/1	0.9	9/198	9	0.00573397	1	0.00573397	up_regulated
BP	GO:0002688	regulation of leukocyte chemotaxis	6	6/0	1	6/198	6	0.00581293	1	0.00581293	up_regulated
BP	GO:2000117	negative regulation of cysteine-type endopeptidase activity	6	6/0	1	6/198	6	0.00581293	1	0.00581293	up_regulated
BP	GO:0071677	positive regulation of mononuclear cell migration	3	3/0	1	3/198	3	0.00582173	1	0.00582173	up_regulated
BP	GO:0043551	regulation of phosphatidylinositol 3-kinase activity	4	4/0	1	4/198	4	0.00582173	1	0.00582173	up_regulated
BP	GO:1903018	regulation of glycoprotein metabolic process	4	4/0	1	4/198	4	0.00582173	1	0.00582173	up_regulated
BP	GO:1903038	negative regulation of leukocyte cell-cell adhesion	6	6/0	1	6/198	6	0.00599134	1	0.00599134	up_regulated
BP	GO:0012501	programmed cell death	40	38/2	0.95	38/198	38	0.00603468	1	0.00603468	up_regulated
BP	GO:0043062	extracellular structure organization	13	12/1	0.923077	12/198	12	0.00621433	1	0.00621433	up_regulated
CC	GO:0031226	intrinsic component of plasma membrane	39	33/6	0.846154	33/209	33	0.00656021	1	0.00656021	up_regulated
BP	GO:0071260	cellular response to mechanical stimulus	5	5/0	1	5/198	5	0.00656846	1	0.00656846	up_regulated
BP	GO:0045619	regulation of lymphocyte differentiation	7	7/0	1	7/198	7	0.00682886	1	0.00682886	up_regulated
BP	GO:0002791	regulation of peptide secretion	14	13/1	0.928571	13/198	13	0.00684609	1	0.00684609	up_regulated
BP	GO:0050715	positive regulation of cytokine secretion	6	6/0	1	6/198	6	0.00697202	1	0.00697202	up_regulated
BP	GO:0050670	regulation of lymphocyte proliferation	8	8/0	1	8/198	8	0.00697202	1	0.00697202	up_regulated
BP	GO:0032944	regulation of mononuclear cell proliferation	8	8/0	1	8/198	8	0.00716436	1	0.00716436	up_regulated
BP	GO:0002764	immune response-regulating signaling pathway	16	16/0	1	16/198	16	0.00717995	1	0.00717995	up_regulated
CC	GO:0030658	transport vesicle membrane	8	8/0	1	8/209	8	0.00720823	1	0.00720823	up_regulated
BP	GO:1903020	positive regulation of glycoprotein metabolic process	3	3/0	1	3/198	3	0.00723912	1	0.00723912	up_regulated
BP	GO:0120032	regulation of plasma membrane bounded cell projection assembly	7	7/0	1	7/198	7	0.00738264	1	0.00738264	up_regulated
BP	GO:0010951	negative regulation of endopeptidase activity	10	9/1	0.9	9/198	9	0.00741845	1	0.00741845	up_regulated
BP	GO:0007163	establishment or maintenance of cell polarity	8	8/0	1	8/198	8	0.00745006	1	0.00745006	up_regulated
CC	GO:0044420	extracellular matrix component	6	6/0	1	6/209	6	0.00756144	1	0.00756144	up_regulated
BP	GO:0032612	interleukin-1 production	5	5/0	1	5/198	5	0.00777855	1	0.00777855	up_regulated
BP	GO:0060491	regulation of cell projection assembly	7	7/0	1	7/198	7	0.00777855	1	0.00777855	up_regulated
BP	GO:0034695	response to prostaglandin E	3	3/0	1	3/198	3	0.00793209	1	0.00793209	up_regulated
BP	GO:0045662	negative regulation of myoblast differentiation	3	3/0	1	3/198	3	0.00793209	1	0.00793209	up_regulated
MF	GO:0005031	tumor necrosis factor-activated receptor activity	3	3/0	1	3/197	3	0.00793209	1	0.00793209	up_regulated
MF	GO:0005035	death receptor activity	3	3/0	1	3/197	3	0.00793209	1	0.00793209	up_regulated
BP	GO:0050701	interleukin-1 secretion	4	4/0	1	4/198	4	0.00847615	1	0.00847615	up_regulated
MF	GO:0033218	amide binding	14	10/4	0.714286	10/197	10	0.00857923	1	0.00857923	up_regulated
BP	GO:2000406	positive regulation of T cell migration	3	3/0	1	3/198	3	0.00882313	1	0.00882313	up_regulated
BP	GO:0070663	regulation of leukocyte proliferation	8	8/0	1	8/198	8	0.0090663	1	0.0090663	up_regulated
BP	GO:0032963	collagen metabolic process	6	6/0	1	6/198	6	0.0090663	1	0.0090663	up_regulated
BP	GO:0043550	regulation of lipid kinase activity	4	4/0	1	4/198	4	0.00959034	1	0.00959034	up_regulated
BP	GO:0010466	negative regulation of peptidase activity	10	9/1	0.9	9/198	9	0.00978956	1	0.00978956	up_regulated
BP	GO:0002449	lymphocyte mediated immunity	10	10/0	1	10/198	10	0.00978956	1	0.00978956	up_regulated
BP	GO:0001822	kidney development	9	9/0	1	9/198	9	0.00978956	1	0.00978956	up_regulated
BP	GO:0065009	regulation of molecular function	61	54/7	0.885246	54/198	54	0.00992213	1	0.00992213	up_regulated
BP	GO:0050854	regulation of antigen receptor-mediated signaling pathway	4	4/0	1	4/198	4	0.0100916	1	0.0100916	up_regulated
BP	GO:0002757	immune response-activating signal transduction	15	15/0	1	15/198	15	0.0101407	1	0.0101407	up_regulated
BP	GO:0002768	immune response-regulating cell surface receptor signaling pathway	13	13/0	1	13/198	13	0.0101407	1	0.0101407	up_regulated
BP	GO:0010950	positive regulation of endopeptidase activity	8	7/1	0.875	7/198	7	0.0101878	1	0.0101878	up_regulated
BP	GO:0050708	regulation of protein secretion	13	12/1	0.923077	12/198	12	0.0101878	1	0.0101878	up_regulated
BP	GO:0048709	oligodendrocyte differentiation	5	5/0	1	5/198	5	0.0103553	1	0.0103553	up_regulated
BP	GO:0043280	positive regulation of cysteine-type endopeptidase activity involved in apoptotic process	7	6/1	0.857143	6/198	6	0.0105497	1	0.0105497	up_regulated
BP	GO:0070228	regulation of lymphocyte apoptotic process	4	4/0	1	4/198	4	0.0105497	1	0.0105497	up_regulated
BP	GO:0006915	apoptotic process	37	35/2	0.945946	35/198	35	0.0109358	1	0.0109358	up_regulated
BP	GO:0006919	activation of cysteine-type endopeptidase activity involved in apoptotic process	5	5/0	1	5/198	5	0.0111692	1	0.0111692	up_regulated
BP	GO:0032649	regulation of interferon-gamma production	5	5/0	1	5/198	5	0.0111692	1	0.0111692	up_regulated
BP	GO:0043154	negative regulation of cysteine-type endopeptidase activity involved in apoptotic process	5	5/0	1	5/198	5	0.0111692	1	0.0111692	up_regulated
BP	GO:0060512	prostate gland morphogenesis	3	3/0	1	3/198	3	0.0114518	1	0.0114518	up_regulated
CC	GO:0005887	integral component of plasma membrane	37	31/6	0.837838	31/209	31	0.011462	1	0.011462	up_regulated
CC	GO:0005604	basement membrane	5	5/0	1	5/209	5	0.011462	1	0.011462	up_regulated
BP	GO:0045597	positive regulation of cell differentiation	21	20/1	0.952381	20/198	20	0.0117393	1	0.0117393	up_regulated
CC	GO:0030133	transport vesicle	12	11/1	0.916667	11/209	11	0.0117393	1	0.0117393	up_regulated
BP	GO:1902107	positive regulation of leukocyte differentiation	6	6/0	1	6/198	6	0.0118608	1	0.0118608	up_regulated
BP	GO:0002253	activation of immune response	16	16/0	1	16/198	16	0.0118925	1	0.0118925	up_regulated
MF	GO:0004896	cytokine receptor activity	5	5/0	1	5/197	5	0.0119875	1	0.0119875	up_regulated
BP	GO:0032651	regulation of interleukin-1 beta production	4	4/0	1	4/198	4	0.0121965	1	0.0121965	up_regulated
CC	GO:0030136	clathrin-coated vesicle	7	7/0	1	7/209	7	0.0121965	1	0.0121965	up_regulated
BP	GO:0006959	humoral immune response	10	10/0	1	10/198	10	0.0122707	1	0.0122707	up_regulated
BP	GO:0051961	negative regulation of nervous system development	9	9/0	1	9/198	9	0.0126463	1	0.0126463	up_regulated
BP	GO:0006968	cellular defense response	4	4/0	1	4/198	4	0.0128471	1	0.0128471	up_regulated
BP	GO:0045596	negative regulation of cell differentiation	18	16/2	0.888889	16/198	16	0.0129765	1	0.0129765	up_regulated
BP	GO:0007219	Notch signaling pathway	7	7/0	1	7/198	7	0.0129765	1	0.0129765	up_regulated
BP	GO:0002828	regulation of type 2 immune response	3	3/0	1	3/198	3	0.0131375	1	0.0131375	up_regulated
BP	GO:0043552	positive regulation of phosphatidylinositol 3-kinase activity	3	3/0	1	3/198	3	0.0131375	1	0.0131375	up_regulated
BP	GO:0050716	positive regulation of interleukin-1 secretion	3	3/0	1	3/198	3	0.0131375	1	0.0131375	up_regulated
BP	GO:0051491	positive regulation of filopodium assembly	3	3/0	1	3/198	3	0.0131375	1	0.0131375	up_regulated
CC	GO:0005769	early endosome	11	10/1	0.909091	10/209	10	0.0131375	1	0.0131375	up_regulated
BP	GO:0048247	lymphocyte chemotaxis	4	4/0	1	4/198	4	0.0133057	1	0.0133057	up_regulated
CC	GO:0031901	early endosome membrane	6	6/0	1	6/209	6	0.0133057	1	0.0133057	up_regulated
BP	GO:0008219	cell death	40	38/2	0.95	38/198	38	0.0135883	1	0.0135883	up_regulated
BP	GO:0050853	B cell receptor signaling pathway	5	5/0	1	5/198	5	0.0135883	1	0.0135883	up_regulated
BP	GO:0032101	regulation of response to external stimulus	20	18/2	0.9	18/198	18	0.0140259	1	0.0140259	up_regulated
BP	GO:0002429	immune response-activating cell surface receptor signaling pathway	12	12/0	1	12/198	12	0.0140259	1	0.0140259	up_regulated
BP	GO:0034694	response to prostaglandin	3	3/0	1	3/198	3	0.0140259	1	0.0140259	up_regulated
BP	GO:0070229	negative regulation of lymphocyte apoptotic process	3	3/0	1	3/198	3	0.0140259	1	0.0140259	up_regulated
BP	GO:2000403	positive regulation of lymphocyte migration	3	3/0	1	3/198	3	0.0140259	1	0.0140259	up_regulated
MF	GO:0008519	ammonium transmembrane transporter activity	3	3/0	1	3/197	3	0.0140259	1	0.0140259	up_regulated
BP	GO:0042981	regulation of apoptotic process	30	29/1	0.966667	29/198	29	0.014069	1	0.014069	up_regulated
BP	GO:0071356	cellular response to tumor necrosis factor	10	9/1	0.9	9/198	9	0.0146009	1	0.0146009	up_regulated
BP	GO:0035457	cellular response to interferon-alpha	2	2/0	1	2/198	2	0.0146128	1	0.0146128	up_regulated
BP	GO:0039530	MDA-5 signaling pathway	2	2/0	1	2/198	2	0.0146128	1	0.0146128	up_regulated
BP	GO:0045060	negative thymic T cell selection	2	2/0	1	2/198	2	0.0146128	1	0.0146128	up_regulated
BP	GO:0051665	membrane raft localization	2	2/0	1	2/198	2	0.0146128	1	0.0146128	up_regulated
BP	GO:0070970	interleukin-2 secretion	2	2/0	1	2/198	2	0.0146128	1	0.0146128	up_regulated
MF	GO:0019957	C-C chemokine binding	2	2/0	1	2/197	2	0.0146128	1	0.0146128	up_regulated
MF	GO:0032395	MHC class II receptor activity	2	2/0	1	2/197	2	0.0146128	1	0.0146128	up_regulated
BP	GO:0010952	positive regulation of peptidase activity	9	7/2	0.777778	7/198	7	0.014648	1	0.014648	up_regulated
BP	GO:0050868	negative regulation of T cell activation	5	5/0	1	5/198	5	0.014648	1	0.014648	up_regulated
CC	GO:0008305	integrin complex	3	3/0	1	3/209	3	0.014648	1	0.014648	up_regulated
BP	GO:0032735	positive regulation of interleukin-12 production	3	3/0	1	3/198	3	0.0147361	1	0.0147361	up_regulated
BP	GO:0050714	positive regulation of protein secretion	9	8/1	0.888889	8/198	8	0.0149428	1	0.0149428	up_regulated
BP	GO:0043067	regulation of programmed cell death	30	29/1	0.966667	29/198	29	0.0151335	1	0.0151335	up_regulated
CC	GO:0098796	membrane protein complex	24	23/1	0.958333	23/209	23	0.0156344	1	0.0156344	up_regulated
BP	GO:0010810	regulation of cell-substrate adhesion	7	7/0	1	7/198	7	0.0157132	1	0.0157132	up_regulated
BP	GO:0090218	positive regulation of lipid kinase activity	3	3/0	1	3/198	3	0.0158026	1	0.0158026	up_regulated
BP	GO:2000404	regulation of T cell migration	3	3/0	1	3/198	3	0.0158026	1	0.0158026	up_regulated
BP	GO:0033993	response to lipid	24	19/5	0.791667	19/198	19	0.0162739	1	0.0162739	up_regulated
BP	GO:0002697	regulation of immune effector process	11	11/0	1	11/198	11	0.0162984	1	0.0162984	up_regulated
CC	GO:0030665	clathrin-coated vesicle membrane	5	5/0	1	5/209	5	0.0165631	1	0.0165631	up_regulated
BP	GO:0070232	regulation of T cell apoptotic process	3	3/0	1	3/198	3	0.0168014	1	0.0168014	up_regulated
BP	GO:0038065	collagen-activated signaling pathway	2	2/0	1	2/198	2	0.0168014	1	0.0168014	up_regulated
BP	GO:0043383	negative T cell selection	2	2/0	1	2/198	2	0.0168014	1	0.0168014	up_regulated
BP	GO:0061081	positive regulation of myeloid leukocyte cytokine production involved in immune response	2	2/0	1	2/198	2	0.0168014	1	0.0168014	up_regulated
CC	GO:0097449	astrocyte projection	2	2/0	1	2/209	2	0.0168014	1	0.0168014	up_regulated
MF	GO:0042287	MHC protein binding	3	3/0	1	3/197	3	0.0168014	1	0.0168014	up_regulated
BP	GO:0050793	regulation of developmental process	44	42/2	0.954545	42/198	42	0.0172042	1	0.0172042	up_regulated
BP	GO:0032611	interleukin-1 beta production	4	4/0	1	4/198	4	0.0175676	1	0.0175676	up_regulated
BP	GO:0008284	positive regulation of cell proliferation	20	19/1	0.95	19/198	19	0.0176933	1	0.0176933	up_regulated
BP	GO:0010001	glial cell differentiation	7	7/0	1	7/198	7	0.0176933	1	0.0176933	up_regulated
BP	GO:0043066	negative regulation of apoptotic process	19	19/0	1	19/198	19	0.0176933	1	0.0176933	up_regulated
CC	GO:0009925	basal plasma membrane	3	3/0	1	3/209	3	0.0176933	1	0.0176933	up_regulated
CC	GO:0098636	protein complex involved in cell adhesion	3	3/0	1	3/209	3	0.0176933	1	0.0176933	up_regulated
BP	GO:0032731	positive regulation of interleukin-1 beta production	3	3/0	1	3/198	3	0.0177392	1	0.0177392	up_regulated
BP	GO:0048713	regulation of oligodendrocyte differentiation	3	3/0	1	3/198	3	0.0177392	1	0.0177392	up_regulated
BP	GO:0010721	negative regulation of cell development	9	9/0	1	9/198	9	0.0178251	1	0.0178251	up_regulated
BP	GO:0030574	collagen catabolic process	4	4/0	1	4/198	4	0.0180561	1	0.0180561	up_regulated
BP	GO:1902531	regulation of intracellular signal transduction	34	33/1	0.970588	33/198	33	0.0183387	1	0.0183387	up_regulated
BP	GO:0014068	positive regulation of phosphatidylinositol 3-kinase signaling	5	4/1	0.8	4/198	4	0.0189006	1	0.0189006	up_regulated
BP	GO:0002720	positive regulation of cytokine production involved in immune response	3	3/0	1	3/198	3	0.0189377	1	0.0189377	up_regulated
BP	GO:0043491	protein kinase B signaling	9	8/1	0.888889	8/198	8	0.0190724	1	0.0190724	up_regulated
BP	GO:0034612	response to tumor necrosis factor	10	9/1	0.9	9/198	9	0.0190724	1	0.0190724	up_regulated
BP	GO:0010935	regulation of macrophage cytokine production	2	2/0	1	2/198	2	0.0190724	1	0.0190724	up_regulated
MF	GO:0004859	phospholipase inhibitor activity	2	2/0	1	2/197	2	0.0190724	1	0.0190724	up_regulated
BP	GO:0043069	negative regulation of programmed cell death	19	19/0	1	19/198	19	0.0197971	1	0.0197971	up_regulated
BP	GO:0045665	negative regulation of neuron differentiation	7	7/0	1	7/198	7	0.0199105	1	0.0199105	up_regulated
BP	GO:0120035	regulation of plasma membrane bounded cell projection organization	14	14/0	1	14/198	14	0.0199326	1	0.0199326	up_regulated
BP	GO:0042092	type 2 immune response	3	3/0	1	3/198	3	0.0200128	1	0.0200128	up_regulated
BP	GO:0002521	leukocyte differentiation	12	12/0	1	12/198	12	0.0207819	1	0.0207819	up_regulated
BP	GO:0043085	positive regulation of catalytic activity	28	26/2	0.928571	26/198	26	0.0208724	1	0.0208724	up_regulated
BP	GO:0051209	release of sequestered calcium ion into cytosol	6	5/1	0.833333	5/198	5	0.0208764	1	0.0208764	up_regulated
BP	GO:0051283	negative regulation of sequestering of calcium ion	6	5/1	0.833333	5/198	5	0.0208764	1	0.0208764	up_regulated
BP	GO:0051897	positive regulation of protein kinase B signaling	6	6/0	1	6/198	6	0.0208764	1	0.0208764	up_regulated
CC	GO:0098590	plasma membrane region	23	21/2	0.913043	21/209	21	0.0209301	1	0.0209301	up_regulated
BP	GO:0051282	regulation of sequestering of calcium ion	6	5/1	0.833333	5/198	5	0.0210841	1	0.0210841	up_regulated
BP	GO:0048015	phosphatidylinositol-mediated signaling	7	6/1	0.857143	6/198	6	0.0210841	1	0.0210841	up_regulated
BP	GO:0002793	positive regulation of peptide secretion	9	8/1	0.888889	8/198	8	0.0210841	1	0.0210841	up_regulated
BP	GO:0050706	regulation of interleukin-1 beta secretion	3	3/0	1	3/198	3	0.0210841	1	0.0210841	up_regulated
BP	GO:0071675	regulation of mononuclear cell migration	3	3/0	1	3/198	3	0.0210841	1	0.0210841	up_regulated
BP	GO:0050864	regulation of B cell activation	6	6/0	1	6/198	6	0.0210841	1	0.0210841	up_regulated
BP	GO:0050768	negative regulation of neurogenesis	8	8/0	1	8/198	8	0.0210841	1	0.0210841	up_regulated
BP	GO:0031274	positive regulation of pseudopodium assembly	2	2/0	1	2/198	2	0.0210841	1	0.0210841	up_regulated
BP	GO:0050862	positive regulation of T cell receptor signaling pathway	2	2/0	1	2/198	2	0.0210841	1	0.0210841	up_regulated
BP	GO:0060081	membrane hyperpolarization	2	2/0	1	2/198	2	0.0210841	1	0.0210841	up_regulated
BP	GO:0061430	bone trabecula morphogenesis	2	2/0	1	2/198	2	0.0210841	1	0.0210841	up_regulated
BP	GO:0072182	regulation of nephron tubule epithelial cell differentiation	2	2/0	1	2/198	2	0.0210841	1	0.0210841	up_regulated
BP	GO:0042063	gliogenesis	8	8/0	1	8/198	8	0.0214919	1	0.0214919	up_regulated
BP	GO:0031344	regulation of cell projection organization	14	14/0	1	14/198	14	0.0216467	1	0.0216467	up_regulated
BP	GO:0009612	response to mechanical stimulus	7	7/0	1	7/198	7	0.0218421	1	0.0218421	up_regulated
CC	GO:0016323	basolateral plasma membrane	8	7/1	0.875	7/209	7	0.0219979	1	0.0219979	up_regulated
BP	GO:0043410	positive regulation of MAPK cascade	14	13/1	0.928571	13/198	13	0.0221359	1	0.0221359	up_regulated
BP	GO:1903725	regulation of phospholipid metabolic process	4	4/0	1	4/198	4	0.0221359	1	0.0221359	up_regulated
BP	GO:0048017	inositol lipid-mediated signaling	7	6/1	0.857143	6/198	6	0.0223128	1	0.0223128	up_regulated
CC	GO:0005768	endosome	20	18/2	0.9	18/209	18	0.0225446	1	0.0225446	up_regulated
BP	GO:0051208	sequestering of calcium ion	6	5/1	0.833333	5/198	5	0.0227488	1	0.0227488	up_regulated
BP	GO:0072088	nephron epithelium morphogenesis	4	4/0	1	4/198	4	0.0229563	1	0.0229563	up_regulated
BP	GO:0090184	positive regulation of kidney development	3	3/0	1	3/198	3	0.0230235	1	0.0230235	up_regulated
BP	GO:0097028	dendritic cell differentiation	3	3/0	1	3/198	3	0.0230235	1	0.0230235	up_regulated
BP	GO:0023051	regulation of signaling	58	54/4	0.931034	54/198	54	0.0234057	1	0.0234057	up_regulated
BP	GO:0010934	macrophage cytokine production	2	2/0	1	2/198	2	0.0234062	1	0.0234062	up_regulated
BP	GO:0031272	regulation of pseudopodium assembly	2	2/0	1	2/198	2	0.0234062	1	0.0234062	up_regulated
BP	GO:0072488	ammonium transmembrane transport	2	2/0	1	2/198	2	0.0234062	1	0.0234062	up_regulated
BP	GO:0090148	membrane fission	2	2/0	1	2/198	2	0.0234062	1	0.0234062	up_regulated
MF	GO:0034236	protein kinase A catalytic subunit binding	2	2/0	1	2/197	2	0.0234062	1	0.0234062	up_regulated
BP	GO:0018108	peptidyl-tyrosine phosphorylation	10	10/0	1	10/198	10	0.0238458	1	0.0238458	up_regulated
CC	GO:0055037	recycling endosome	7	6/1	0.857143	6/209	6	0.0238826	1	0.0238826	up_regulated
BP	GO:0061333	renal tubule morphogenesis	4	4/0	1	4/198	4	0.024387	1	0.024387	up_regulated
BP	GO:0072028	nephron morphogenesis	4	4/0	1	4/198	4	0.024387	1	0.024387	up_regulated
BP	GO:0050871	positive regulation of B cell activation	5	5/0	1	5/198	5	0.024387	1	0.024387	up_regulated
BP	GO:0018212	peptidyl-tyrosine modification	10	10/0	1	10/198	10	0.0248035	1	0.0248035	up_regulated
MF	GO:0030545	receptor regulator activity	12	12/0	1	12/197	12	0.0250636	1	0.0250636	up_regulated
BP	GO:0043408	regulation of MAPK cascade	17	16/1	0.941176	16/198	16	0.0251074	1	0.0251074	up_regulated
BP	GO:0031345	negative regulation of cell projection organization	6	6/0	1	6/198	6	0.025167	1	0.025167	up_regulated
BP	GO:0010107	potassium ion import	4	3/1	0.75	3/198	3	0.025243	1	0.025243	up_regulated
BP	GO:0051896	regulation of protein kinase B signaling	8	7/1	0.875	7/198	7	0.025243	1	0.025243	up_regulated
BP	GO:0044093	positive regulation of molecular function	32	30/2	0.9375	30/198	30	0.025243	1	0.025243	up_regulated
BP	GO:0051489	regulation of filopodium assembly	3	3/0	1	3/198	3	0.025243	1	0.025243	up_regulated
CC	GO:0031252	cell leading edge	11	10/1	0.909091	10/209	10	0.025243	1	0.025243	up_regulated
MF	GO:0001664	G-protein coupled receptor binding	8	8/0	1	8/197	8	0.025243	1	0.025243	up_regulated
BP	GO:0032496	response to lipopolysaccharide	10	9/1	0.9	9/198	9	0.025292	1	0.025292	up_regulated
BP	GO:0001525	angiogenesis	13	13/0	1	13/198	13	0.0253975	1	0.0253975	up_regulated
BP	GO:0030855	epithelial cell differentiation	16	16/0	1	16/198	16	0.0253977	1	0.0253977	up_regulated
BP	GO:0009888	tissue development	35	33/2	0.942857	33/198	33	0.0255417	1	0.0255417	up_regulated
BP	GO:0072160	nephron tubule epithelial cell differentiation	2	2/0	1	2/198	2	0.0255417	1	0.0255417	up_regulated
BP	GO:0042327	positive regulation of phosphorylation	21	20/1	0.952381	20/198	20	0.0259106	1	0.0259106	up_regulated
CC	GO:0030669	clathrin-coated endocytic vesicle membrane	3	3/0	1	3/209	3	0.0260513	1	0.0260513	up_regulated
BP	GO:1903727	positive regulation of phospholipid metabolic process	3	3/0	1	3/198	3	0.0262182	1	0.0262182	up_regulated
BP	GO:0030010	establishment of cell polarity	5	5/0	1	5/198	5	0.0266463	1	0.0266463	up_regulated
BP	GO:0009966	regulation of signal transduction	51	49/2	0.960784	49/198	49	0.0269981	1	0.0269981	up_regulated
BP	GO:0002456	T cell mediated immunity	4	4/0	1	4/198	4	0.0275571	1	0.0275571	up_regulated
BP	GO:0050702	interleukin-1 beta secretion	3	3/0	1	3/198	3	0.0276576	1	0.0276576	up_regulated
BP	GO:0002790	peptide secretion	14	13/1	0.928571	13/198	13	0.02793	1	0.02793	up_regulated
BP	GO:0031269	pseudopodium assembly	2	2/0	1	2/198	2	0.0283301	1	0.0283301	up_regulated
CC	GO:0044433	cytoplasmic vesicle part	30	26/4	0.866667	26/209	26	0.0283301	1	0.0283301	up_regulated
BP	GO:0045445	myoblast differentiation	4	4/0	1	4/198	4	0.0284026	1	0.0284026	up_regulated
BP	GO:0002792	negative regulation of peptide secretion	5	5/0	1	5/198	5	0.0288046	1	0.0288046	up_regulated
BP	GO:0035850	epithelial cell differentiation involved in kidney development	3	3/0	1	3/198	3	0.0288739	1	0.0288739	up_regulated
BP	GO:0044764	multi-organism cellular process	3	3/0	1	3/198	3	0.0288739	1	0.0288739	up_regulated
BP	GO:0097366	response to bronchodilator	3	3/0	1	3/198	3	0.0288739	1	0.0288739	up_regulated
BP	GO:0032270	positive regulation of cellular protein metabolic process	29	27/2	0.931034	27/198	27	0.028918	1	0.028918	up_regulated
BP	GO:0051346	negative regulation of hydrolase activity	13	11/2	0.846154	11/198	11	0.0290403	1	0.0290403	up_regulated
BP	GO:0002699	positive regulation of immune effector process	6	6/0	1	6/198	6	0.0291388	1	0.0291388	up_regulated
BP	GO:0010941	regulation of cell death	30	29/1	0.966667	29/198	29	0.0294116	1	0.0294116	up_regulated
BP	GO:0097553	calcium ion transmembrane import into cytosol	6	5/1	0.833333	5/198	5	0.0301195	1	0.0301195	up_regulated
BP	GO:0051271	negative regulation of cellular component movement	9	9/0	1	9/198	9	0.0301719	1	0.0301719	up_regulated
BP	GO:0030857	negative regulation of epithelial cell differentiation	3	3/0	1	3/198	3	0.0301719	1	0.0301719	up_regulated
BP	GO:0071560	cellular response to transforming growth factor beta stimulus	7	7/0	1	7/198	7	0.0303628	1	0.0303628	up_regulated
BP	GO:0010562	positive regulation of phosphorus metabolic process	22	21/1	0.954545	21/198	21	0.030497	1	0.030497	up_regulated
BP	GO:0045937	positive regulation of phosphate metabolic process	22	21/1	0.954545	21/198	21	0.030497	1	0.030497	up_regulated
BP	GO:0072643	interferon-gamma secretion	2	2/0	1	2/198	2	0.030497	1	0.030497	up_regulated
BP	GO:0090185	negative regulation of kidney development	2	2/0	1	2/198	2	0.030497	1	0.030497	up_regulated
BP	GO:2000738	positive regulation of stem cell differentiation	2	2/0	1	2/198	2	0.030497	1	0.030497	up_regulated
CC	GO:0097386	glial cell projection	2	2/0	1	2/209	2	0.030497	1	0.030497	up_regulated
MF	GO:0045236	CXCR chemokine receptor binding	2	2/0	1	2/197	2	0.030497	1	0.030497	up_regulated
MF	GO:0055102	lipase inhibitor activity	2	2/0	1	2/197	2	0.030497	1	0.030497	up_regulated
BP	GO:0002367	cytokine production involved in immune response	4	4/0	1	4/198	4	0.0305473	1	0.0305473	up_regulated
BP	GO:0045778	positive regulation of ossification	4	4/0	1	4/198	4	0.0305473	1	0.0305473	up_regulated
BP	GO:0045599	negative regulation of fat cell differentiation	4	3/1	0.75	3/198	3	0.0310896	1	0.0310896	up_regulated
BP	GO:0050731	positive regulation of peptidyl-tyrosine phosphorylation	6	6/0	1	6/198	6	0.0310896	1	0.0310896	up_regulated
BP	GO:0001934	positive regulation of protein phosphorylation	20	19/1	0.95	19/198	19	0.0311582	1	0.0311582	up_regulated
BP	GO:0048661	positive regulation of smooth muscle cell proliferation	4	4/0	1	4/198	4	0.0314963	1	0.0314963	up_regulated
BP	GO:0002237	response to molecule of bacterial origin	10	9/1	0.9	9/198	9	0.0316767	1	0.0316767	up_regulated
BP	GO:0046683	response to organophosphorus	5	5/0	1	5/198	5	0.0316767	1	0.0316767	up_regulated
BP	GO:0071559	response to transforming growth factor beta	7	7/0	1	7/198	7	0.0319106	1	0.0319106	up_regulated
BP	GO:0097190	apoptotic signaling pathway	14	13/1	0.928571	13/198	13	0.032029	1	0.032029	up_regulated
BP	GO:0035295	tube development	21	20/1	0.952381	20/198	20	0.032029	1	0.032029	up_regulated
BP	GO:0070231	T cell apoptotic process	3	3/0	1	3/198	3	0.032029	1	0.032029	up_regulated
BP	GO:0098586	cellular response to virus	3	3/0	1	3/198	3	0.032029	1	0.032029	up_regulated
BP	GO:0050671	positive regulation of lymphocyte proliferation	5	5/0	1	5/198	5	0.032029	1	0.032029	up_regulated
BP	GO:0051250	negative regulation of lymphocyte activation	5	5/0	1	5/198	5	0.032029	1	0.032029	up_regulated
CC	GO:0042571	immunoglobulin complex, circulating	3	3/0	1	3/209	3	0.032029	1	0.032029	up_regulated
CC	GO:0046658	anchored component of plasma membrane	3	3/0	1	3/209	3	0.032029	1	0.032029	up_regulated
BP	GO:0007221	positive regulation of transcription of Notch receptor target	2	2/0	1	2/198	2	0.0322153	1	0.0322153	up_regulated
BP	GO:0010224	response to UV-B	2	2/0	1	2/198	2	0.0322153	1	0.0322153	up_regulated
BP	GO:0035743	CD4-positive, alpha-beta T cell cytokine production	2	2/0	1	2/198	2	0.0322153	1	0.0322153	up_regulated
BP	GO:0050860	negative regulation of T cell receptor signaling pathway	2	2/0	1	2/198	2	0.0322153	1	0.0322153	up_regulated
BP	GO:0060219	camera-type eye photoreceptor cell differentiation	2	2/0	1	2/198	2	0.0322153	1	0.0322153	up_regulated
BP	GO:0061318	renal filtration cell differentiation	2	2/0	1	2/198	2	0.0322153	1	0.0322153	up_regulated
BP	GO:0072112	glomerular visceral epithelial cell differentiation	2	2/0	1	2/198	2	0.0322153	1	0.0322153	up_regulated
BP	GO:2000696	regulation of epithelial cell differentiation involved in kidney development	2	2/0	1	2/198	2	0.0322153	1	0.0322153	up_regulated
BP	GO:2001269	positive regulation of cysteine-type endopeptidase activity involved in apoptotic signaling pathway	2	2/0	1	2/198	2	0.0322153	1	0.0322153	up_regulated
BP	GO:0032946	positive regulation of mononuclear cell proliferation	5	5/0	1	5/198	5	0.0322564	1	0.0322564	up_regulated
CC	GO:0072562	blood microparticle	8	6/2	0.75	6/209	6	0.0322564	1	0.0322564	up_regulated
BP	GO:1901654	response to ketone	7	6/1	0.857143	6/198	6	0.0325709	1	0.0325709	up_regulated
BP	GO:0030850	prostate gland development	3	3/0	1	3/198	3	0.032879	1	0.032879	up_regulated
BP	GO:2000401	regulation of lymphocyte migration	3	3/0	1	3/198	3	0.032879	1	0.032879	up_regulated
BP	GO:0050730	regulation of peptidyl-tyrosine phosphorylation	7	7/0	1	7/198	7	0.0331085	1	0.0331085	up_regulated
BP	GO:0042742	defense response to bacterium	8	8/0	1	8/198	8	0.0332091	1	0.0332091	up_regulated
MF	GO:0048018	receptor ligand activity	11	11/0	1	11/197	11	0.0332663	1	0.0332663	up_regulated
BP	GO:0045861	negative regulation of proteolysis	10	9/1	0.9	9/198	9	0.0336322	1	0.0336322	up_regulated
BP	GO:0060548	negative regulation of cell death	19	19/0	1	19/198	19	0.0336322	1	0.0336322	up_regulated
BP	GO:0030278	regulation of ossification	6	6/0	1	6/198	6	0.0336322	1	0.0336322	up_regulated
BP	GO:0010646	regulation of cell communication	55	52/3	0.945455	52/198	52	0.0337493	1	0.0337493	up_regulated
BP	GO:0031346	positive regulation of cell projection organization	9	9/0	1	9/198	9	0.0338857	1	0.0338857	up_regulated
BP	GO:0032655	regulation of interleukin-12 production	3	3/0	1	3/198	3	0.0338857	1	0.0338857	up_regulated
BP	GO:0045661	regulation of myoblast differentiation	3	3/0	1	3/198	3	0.0338857	1	0.0338857	up_regulated
BP	GO:0060760	positive regulation of response to cytokine stimulus	3	3/0	1	3/198	3	0.0338857	1	0.0338857	up_regulated
BP	GO:0006911	phagocytosis, engulfment	4	4/0	1	4/198	4	0.0338857	1	0.0338857	up_regulated
BP	GO:0006833	water transport	2	2/0	1	2/198	2	0.0338857	1	0.0338857	up_regulated
BP	GO:0045061	thymic T cell selection	2	2/0	1	2/198	2	0.0338857	1	0.0338857	up_regulated
BP	GO:0045624	positive regulation of T-helper cell differentiation	2	2/0	1	2/198	2	0.0338857	1	0.0338857	up_regulated
BP	GO:0070233	negative regulation of T cell apoptotic process	2	2/0	1	2/198	2	0.0338857	1	0.0338857	up_regulated
BP	GO:0072077	renal vesicle morphogenesis	2	2/0	1	2/198	2	0.0338857	1	0.0338857	up_regulated
BP	GO:0072111	cell proliferation involved in kidney development	2	2/0	1	2/198	2	0.0338857	1	0.0338857	up_regulated
BP	GO:0072311	glomerular epithelial cell differentiation	2	2/0	1	2/198	2	0.0338857	1	0.0338857	up_regulated
BP	GO:1905331	negative regulation of morphogenesis of an epithelium	2	2/0	1	2/198	2	0.0338857	1	0.0338857	up_regulated
MF	GO:0051018	protein kinase A binding	3	3/0	1	3/197	3	0.0338857	1	0.0338857	up_regulated
MF	GO:0034237	protein kinase A regulatory subunit binding	2	2/0	1	2/197	2	0.0338857	1	0.0338857	up_regulated
MF	GO:0098641	cadherin binding involved in cell-cell adhesion	2	2/0	1	2/197	2	0.0338857	1	0.0338857	up_regulated
BP	GO:0046632	alpha-beta T cell differentiation	4	4/0	1	4/198	4	0.0343615	1	0.0343615	up_regulated
BP	GO:0120034	positive regulation of plasma membrane bounded cell projection assembly	4	4/0	1	4/198	4	0.0343615	1	0.0343615	up_regulated
CC	GO:0019814	immunoglobulin complex	3	3/0	1	3/209	3	0.0344647	1	0.0344647	up_regulated
BP	GO:0071320	cellular response to cAMP	3	3/0	1	3/198	3	0.0346267	1	0.0346267	up_regulated
BP	GO:0072678	T cell migration	3	3/0	1	3/198	3	0.0346267	1	0.0346267	up_regulated
BP	GO:0000165	MAPK cascade	19	18/1	0.947368	18/198	18	0.0348446	1	0.0348446	up_regulated
BP	GO:0009306	protein secretion	13	12/1	0.923077	12/198	12	0.0349172	1	0.0349172	up_regulated
CC	GO:0016324	apical plasma membrane	8	8/0	1	8/209	8	0.0350601	1	0.0350601	up_regulated
BP	GO:0060993	kidney morphogenesis	4	4/0	1	4/198	4	0.0351357	1	0.0351357	up_regulated
CC	GO:0031410	cytoplasmic vesicle	41	36/5	0.878049	36/209	36	0.0351357	1	0.0351357	up_regulated
BP	GO:0051046	regulation of secretion	16	15/1	0.9375	15/198	15	0.0351473	1	0.0351473	up_regulated
CC	GO:0097708	intracellular vesicle	41	36/5	0.878049	36/209	36	0.0356463	1	0.0356463	up_regulated
BP	GO:0032615	interleukin-12 production	3	3/0	1	3/198	3	0.0358033	1	0.0358033	up_regulated
BP	GO:0032727	positive regulation of interferon-alpha production	2	2/0	1	2/198	2	0.0358033	1	0.0358033	up_regulated
BP	GO:0042454	ribonucleoside catabolic process	2	2/0	1	2/198	2	0.0358033	1	0.0358033	up_regulated
BP	GO:0071711	basement membrane organization	2	2/0	1	2/198	2	0.0358033	1	0.0358033	up_regulated
BP	GO:0072087	renal vesicle development	2	2/0	1	2/198	2	0.0358033	1	0.0358033	up_regulated
BP	GO:0072234	metanephric nephron tubule development	2	2/0	1	2/198	2	0.0358033	1	0.0358033	up_regulated
BP	GO:2000737	negative regulation of stem cell differentiation	2	2/0	1	2/198	2	0.0358033	1	0.0358033	up_regulated
BP	GO:0070665	positive regulation of leukocyte proliferation	5	5/0	1	5/198	5	0.0358033	1	0.0358033	up_regulated
CC	GO:0098644	complex of collagen trimers	2	2/0	1	2/209	2	0.0358033	1	0.0358033	up_regulated
MF	GO:0034987	immunoglobulin receptor binding	3	3/0	1	3/197	3	0.0358033	1	0.0358033	up_regulated
MF	GO:0050840	extracellular matrix binding	3	3/0	1	3/197	3	0.0358033	1	0.0358033	up_regulated
CC	GO:0045178	basal part of cell	3	3/0	1	3/209	3	0.0366833	1	0.0366833	up_regulated
BP	GO:0048146	positive regulation of fibroblast proliferation	3	3/0	1	3/198	3	0.0369266	1	0.0369266	up_regulated
BP	GO:0035239	tube morphogenesis	17	17/0	1	17/198	17	0.0377318	1	0.0377318	up_regulated
BP	GO:0002683	negative regulation of immune system process	11	10/1	0.909091	10/198	10	0.0379244	1	0.0379244	up_regulated
BP	GO:0048660	regulation of smooth muscle cell proliferation	6	5/1	0.833333	5/198	5	0.0384729	1	0.0384729	up_regulated
BP	GO:0050857	positive regulation of antigen receptor-mediated signaling pathway	2	2/0	1	2/198	2	0.0387203	1	0.0387203	up_regulated
BP	GO:2000114	regulation of establishment of cell polarity	2	2/0	1	2/198	2	0.0387203	1	0.0387203	up_regulated
BP	GO:0042102	positive regulation of T cell proliferation	4	4/0	1	4/198	4	0.0387798	1	0.0387798	up_regulated
BP	GO:0060402	calcium ion transport into cytosol	6	5/1	0.833333	5/198	5	0.0398994	1	0.0398994	up_regulated
BP	GO:0042325	regulation of phosphorylation	28	26/2	0.928571	26/198	26	0.0398994	1	0.0398994	up_regulated
BP	GO:0001657	ureteric bud development	4	4/0	1	4/198	4	0.0398994	1	0.0398994	up_regulated
BP	GO:0051591	response to cAMP	4	4/0	1	4/198	4	0.0398994	1	0.0398994	up_regulated
BP	GO:0042130	negative regulation of T cell proliferation	3	3/0	1	3/198	3	0.0398994	1	0.0398994	up_regulated
BP	GO:0061005	cell differentiation involved in kidney development	3	3/0	1	3/198	3	0.0398994	1	0.0398994	up_regulated
BP	GO:0016064	immunoglobulin mediated immune response	6	6/0	1	6/198	6	0.0398994	1	0.0398994	up_regulated
BP	GO:0071214	cellular response to abiotic stimulus	8	8/0	1	8/198	8	0.0398994	1	0.0398994	up_regulated
BP	GO:0104004	cellular response to environmental stimulus	8	8/0	1	8/198	8	0.0398994	1	0.0398994	up_regulated
BP	GO:0048659	smooth muscle cell proliferation	6	5/1	0.833333	5/198	5	0.0405046	1	0.0405046	up_regulated
BP	GO:0019724	B cell mediated immunity	6	6/0	1	6/198	6	0.0405046	1	0.0405046	up_regulated
BP	GO:0072163	mesonephric epithelium development	4	4/0	1	4/198	4	0.0405046	1	0.0405046	up_regulated
BP	GO:0072164	mesonephric tubule development	4	4/0	1	4/198	4	0.0405046	1	0.0405046	up_regulated
BP	GO:0051093	negative regulation of developmental process	20	18/2	0.9	18/198	18	0.0405097	1	0.0405097	up_regulated
BP	GO:0033627	cell adhesion mediated by integrin	3	3/0	1	3/198	3	0.0407355	1	0.0407355	up_regulated
BP	GO:0006972	hyperosmotic response	2	2/0	1	2/198	2	0.0407355	1	0.0407355	up_regulated
BP	GO:0050858	negative regulation of antigen receptor-mediated signaling pathway	2	2/0	1	2/198	2	0.0407355	1	0.0407355	up_regulated
BP	GO:0051882	mitochondrial depolarization	2	2/0	1	2/198	2	0.0407355	1	0.0407355	up_regulated
BP	GO:0061082	myeloid leukocyte cytokine production	2	2/0	1	2/198	2	0.0407355	1	0.0407355	up_regulated
BP	GO:0072010	glomerular epithelium development	2	2/0	1	2/198	2	0.0407355	1	0.0407355	up_regulated
BP	GO:0014074	response to purine-containing compound	5	5/0	1	5/198	5	0.040931	1	0.040931	up_regulated
BP	GO:0099024	plasma membrane invagination	4	4/0	1	4/198	4	0.0411975	1	0.0411975	up_regulated
BP	GO:0071229	cellular response to acid chemical	7	6/1	0.857143	6/198	6	0.0413683	1	0.0413683	up_regulated
BP	GO:0023014	signal transduction by protein phosphorylation	19	18/1	0.947368	18/198	18	0.0415605	1	0.0415605	up_regulated
BP	GO:1902105	regulation of leukocyte differentiation	7	7/0	1	7/198	7	0.0415605	1	0.0415605	up_regulated
BP	GO:0002064	epithelial cell development	6	6/0	1	6/198	6	0.0420395	1	0.0420395	up_regulated
BP	GO:0032623	interleukin-2 production	3	3/0	1	3/198	3	0.0421183	1	0.0421183	up_regulated
BP	GO:0002443	leukocyte mediated immunity	17	16/1	0.941176	16/198	16	0.0423614	1	0.0423614	up_regulated
BP	GO:0014066	regulation of phosphatidylinositol 3-kinase signaling	5	4/1	0.8	4/198	4	0.0427276	1	0.0427276	up_regulated
BP	GO:0060429	epithelium development	23	22/1	0.956522	22/198	22	0.0427276	1	0.0427276	up_regulated
BP	GO:0002691	regulation of cellular extravasation	2	2/0	1	2/198	2	0.0427276	1	0.0427276	up_regulated
BP	GO:0006884	cell volume homeostasis	2	2/0	1	2/198	2	0.0427276	1	0.0427276	up_regulated
BP	GO:0007026	negative regulation of microtubule depolymerization	2	2/0	1	2/198	2	0.0427276	1	0.0427276	up_regulated
BP	GO:0031579	membrane raft organization	2	2/0	1	2/198	2	0.0427276	1	0.0427276	up_regulated
BP	GO:0032616	interleukin-13 production	2	2/0	1	2/198	2	0.0427276	1	0.0427276	up_regulated
BP	GO:0072170	metanephric tubule development	2	2/0	1	2/198	2	0.0427276	1	0.0427276	up_regulated
BP	GO:0072243	metanephric nephron epithelium development	2	2/0	1	2/198	2	0.0427276	1	0.0427276	up_regulated
BP	GO:0090189	regulation of branching involved in ureteric bud morphogenesis	2	2/0	1	2/198	2	0.0427276	1	0.0427276	up_regulated
BP	GO:2001267	regulation of cysteine-type endopeptidase activity involved in apoptotic signaling pathway	2	2/0	1	2/198	2	0.0427276	1	0.0427276	up_regulated
CC	GO:0031233	intrinsic component of external side of plasma membrane	2	2/0	1	2/209	2	0.0427276	1	0.0427276	up_regulated
CC	GO:0031528	microvillus membrane	2	2/0	1	2/209	2	0.0427276	1	0.0427276	up_regulated
BP	GO:1901700	response to oxygen-containing compound	32	26/6	0.8125	26/198	26	0.043542	1	0.043542	up_regulated
BP	GO:0032874	positive regulation of stress-activated MAPK cascade	5	5/0	1	5/198	5	0.0435519	1	0.0435519	up_regulated
BP	GO:0031589	cell-substrate adhesion	8	8/0	1	8/198	8	0.0435519	1	0.0435519	up_regulated
BP	GO:0051247	positive regulation of protein metabolic process	29	27/2	0.931034	27/198	27	0.043555	1	0.043555	up_regulated
BP	GO:0001823	mesonephros development	4	4/0	1	4/198	4	0.043555	1	0.043555	up_regulated
BP	GO:0070304	positive regulation of stress-activated protein kinase signaling cascade	5	5/0	1	5/198	5	0.0442921	1	0.0442921	up_regulated
BP	GO:0001658	branching involved in ureteric bud morphogenesis	3	3/0	1	3/198	3	0.0442921	1	0.0442921	up_regulated
BP	GO:0050710	negative regulation of cytokine secretion	3	3/0	1	3/198	3	0.0442921	1	0.0442921	up_regulated
BP	GO:0050918	positive chemotaxis	3	3/0	1	3/198	3	0.0442921	1	0.0442921	up_regulated
BP	GO:0001932	regulation of protein phosphorylation	26	24/2	0.923077	24/198	24	0.0443113	1	0.0443113	up_regulated
MF	GO:0048306	calcium-dependent protein binding	4	3/1	0.75	3/197	3	0.0443113	1	0.0443113	up_regulated
BP	GO:2001237	negative regulation of extrinsic apoptotic signaling pathway	4	4/0	1	4/198	4	0.0443765	1	0.0443765	up_regulated
BP	GO:0097435	supramolecular fiber organization	14	13/1	0.928571	13/198	13	0.0446019	1	0.0446019	up_regulated
BP	GO:0001783	B cell apoptotic process	2	2/0	1	2/198	2	0.0450616	1	0.0450616	up_regulated
BP	GO:0032878	regulation of establishment or maintenance of cell polarity	2	2/0	1	2/198	2	0.0450616	1	0.0450616	up_regulated
BP	GO:2000482	regulation of interleukin-8 secretion	2	2/0	1	2/198	2	0.0450616	1	0.0450616	up_regulated
BP	GO:0048646	anatomical structure formation involved in morphogenesis	20	20/0	1	20/198	20	0.0451269	1	0.0451269	up_regulated
BP	GO:0032526	response to retinoic acid	4	4/0	1	4/198	4	0.0453124	1	0.0453124	up_regulated
BP	GO:0006910	phagocytosis, recognition	3	3/0	1	3/198	3	0.0454215	1	0.0454215	up_regulated
BP	GO:0045669	positive regulation of osteoblast differentiation	3	3/0	1	3/198	3	0.0454215	1	0.0454215	up_regulated
BP	GO:0002695	negative regulation of leukocyte activation	6	5/1	0.833333	5/198	5	0.0454711	1	0.0454711	up_regulated
CC	GO:0030863	cortical cytoskeleton	4	4/0	1	4/209	4	0.0459419	1	0.0459419	up_regulated
BP	GO:0007160	cell-matrix adhesion	6	6/0	1	6/198	6	0.0465309	1	0.0465309	up_regulated
CC	GO:0010008	endosome membrane	11	10/1	0.909091	10/209	10	0.046541	1	0.046541	up_regulated
BP	GO:1903706	regulation of hemopoiesis	10	10/0	1	10/198	10	0.0466459	1	0.0466459	up_regulated
BP	GO:0032835	glomerulus development	3	3/0	1	3/198	3	0.0469295	1	0.0469295	up_regulated
BP	GO:0051047	positive regulation of secretion	10	9/1	0.9	9/198	9	0.0471711	1	0.0471711	up_regulated
BP	GO:0001952	regulation of cell-matrix adhesion	4	4/0	1	4/198	4	0.0473084	1	0.0473084	up_regulated
BP	GO:0051129	negative regulation of cellular component organization	13	13/0	1	13/198	13	0.0473084	1	0.0473084	up_regulated
BP	GO:0002230	positive regulation of defense response to virus by host	2	2/0	1	2/198	2	0.0473084	1	0.0473084	up_regulated
BP	GO:0007214	gamma-aminobutyric acid signaling pathway	2	2/0	1	2/198	2	0.0473084	1	0.0473084	up_regulated
BP	GO:0039528	cytoplasmic pattern recognition receptor signaling pathway in response to virus	2	2/0	1	2/198	2	0.0473084	1	0.0473084	up_regulated
BP	GO:0043372	positive regulation of CD4-positive, alpha-beta T cell differentiation	2	2/0	1	2/198	2	0.0473084	1	0.0473084	up_regulated
BP	GO:0060401	cytosolic calcium ion transport	6	5/1	0.833333	5/198	5	0.047824	1	0.047824	up_regulated
CC	GO:0045334	clathrin-coated endocytic vesicle	3	3/0	1	3/209	3	0.0478253	1	0.0478253	up_regulated
BP	GO:0090087	regulation of peptide transport	15	14/1	0.933333	14/198	14	0.0478255	1	0.0478255	up_regulated
BP	GO:0032729	positive regulation of interferon-gamma production	3	3/0	1	3/198	3	0.0478565	1	0.0478565	up_regulated
BP	GO:1901880	negative regulation of protein depolymerization	3	3/0	1	3/198	3	0.0478565	1	0.0478565	up_regulated
BP	GO:0010324	membrane invagination	4	4/0	1	4/198	4	0.0478565	1	0.0478565	up_regulated
BP	GO:0010811	positive regulation of cell-substrate adhesion	4	4/0	1	4/198	4	0.0478565	1	0.0478565	up_regulated
BP	GO:0016485	protein processing	8	8/0	1	8/198	8	0.0479043	1	0.0479043	up_regulated
BP	GO:0046903	secretion	29	26/3	0.896552	26/198	26	0.0485825	1	0.0485825	up_regulated
BP	GO:0019730	antimicrobial humoral response	4	4/0	1	4/198	4	0.0490448	1	0.0490448	up_regulated
BP	GO:0071230	cellular response to amino acid stimulus	3	3/0	1	3/198	3	0.049233	1	0.049233	up_regulated
BP	GO:0048514	blood vessel morphogenesis	13	13/0	1	13/198	13	0.049233	1	0.049233	up_regulated
BP	GO:0032647	regulation of interferon-alpha production	2	2/0	1	2/198	2	0.049233	1	0.049233	up_regulated
BP	GO:0042044	fluid transport	2	2/0	1	2/198	2	0.049233	1	0.049233	up_regulated
BP	GO:0048245	eosinophil chemotaxis	2	2/0	1	2/198	2	0.049233	1	0.049233	up_regulated
BP	GO:0050718	positive regulation of interleukin-1 beta secretion	2	2/0	1	2/198	2	0.049233	1	0.049233	up_regulated
BP	GO:0060706	cell differentiation involved in embryonic placenta development	2	2/0	1	2/198	2	0.049233	1	0.049233	up_regulated
BP	GO:0060740	prostate gland epithelium morphogenesis	2	2/0	1	2/198	2	0.049233	1	0.049233	up_regulated
BP	GO:0061217	regulation of mesonephros development	2	2/0	1	2/198	2	0.049233	1	0.049233	up_regulated
BP	GO:0072273	metanephric nephron morphogenesis	2	2/0	1	2/198	2	0.049233	1	0.049233	up_regulated
BP	GO:0120033	negative regulation of plasma membrane bounded cell projection assembly	2	2/0	1	2/198	2	0.049233	1	0.049233	up_regulated
BP	GO:0042113	B cell activation	7	7/0	1	7/198	7	0.0499375	1	0.0499375	up_regulated

## Sheet: dys
ONTOLOGY	ID	Description	Count	up_down	fraction_count_used	GeneRatio_used	count_used	p.adjust_up	p.adjust_down	p.adjust_min	pathway_tag
BP	GO:0060337	type I interferon signaling pathway	8	8/0	1	8/65	8	1.69278e-07	1	1.69278e-07	up_regulated
BP	GO:0071357	cellular response to type I interferon	8	8/0	1	8/65	8	1.69278e-07	1	1.69278e-07	up_regulated
BP	GO:0034340	response to type I interferon	8	8/0	1	8/65	8	1.75328e-07	1	1.75328e-07	up_regulated
BP	GO:0048525	negative regulation of viral process	7	7/0	1	7/65	7	3.94747e-06	1	3.94747e-06	up_regulated
BP	GO:1903901	negative regulation of viral life cycle	6	6/0	1	6/65	6	2.48309e-05	1	2.48309e-05	up_regulated
BP	GO:0019221	cytokine-mediated signaling pathway	15	14/1	0.933333	14/65	14	4.41202e-05	1	4.41202e-05	up_regulated
BP	GO:0043903	regulation of symbiosis, encompassing mutualism through parasitism	8	8/0	1	8/65	8	5.62621e-05	1	5.62621e-05	up_regulated
BP	GO:0051607	defense response to virus	8	8/0	1	8/65	8	5.62621e-05	1	5.62621e-05	up_regulated
BP	GO:0071346	cellular response to interferon-gamma	7	7/0	1	7/65	7	8.9378e-05	1	8.9378e-05	up_regulated
BP	GO:0043901	negative regulation of multi-organism process	7	7/0	1	7/65	7	8.9378e-05	1	8.9378e-05	up_regulated
BP	GO:0071345	cellular response to cytokine stimulus	17	15/2	0.882353	15/65	15	0.000154934	1	0.000154934	up_regulated
BP	GO:0034341	response to interferon-gamma	7	7/0	1	7/65	7	0.000154934	1	0.000154934	up_regulated
BP	GO:0050792	regulation of viral process	7	7/0	1	7/65	7	0.000162556	1	0.000162556	up_regulated
BP	GO:0045087	innate immune response	16	14/2	0.875	14/65	14	0.00017294	1	0.00017294	up_regulated
BP	GO:1903900	regulation of viral life cycle	6	6/0	1	6/65	6	0.000207243	1	0.000207243	up_regulated
BP	GO:0034097	response to cytokine	17	15/2	0.882353	15/65	15	0.000281682	1	0.000281682	up_regulated
BP	GO:0009615	response to virus	8	8/0	1	8/65	8	0.000287997	1	0.000287997	up_regulated
BP	GO:0060333	interferon-gamma-mediated signaling pathway	5	5/0	1	5/65	5	0.00029442	1	0.00029442	up_regulated
BP	GO:0006952	defense response	21	18/3	0.857143	18/65	18	0.000435411	1	0.000435411	up_regulated
BP	GO:0044403	symbiont process	14	12/2	0.857143	12/65	12	0.000658847	1	0.000658847	up_regulated
BP	GO:0045071	negative regulation of viral genome replication	4	4/0	1	4/65	4	0.000658847	1	0.000658847	up_regulated
MF	GO:0005044	scavenger receptor activity	4	4/0	1	4/66	4	0.000658847	1	0.000658847	up_regulated
BP	GO:0044419	interspecies interaction between organisms	14	12/2	0.857143	12/65	12	0.00101504	1	0.00101504	up_regulated
BP	GO:0043900	regulation of multi-organism process	8	8/0	1	8/65	8	0.00105404	1	0.00105404	up_regulated
BP	GO:0016032	viral process	13	11/2	0.846154	11/65	11	0.00139597	1	0.00139597	up_regulated
BP	GO:0019058	viral life cycle	8	7/1	0.875	7/65	7	0.00169771	1	0.00169771	up_regulated
BP	GO:0097190	apoptotic signaling pathway	9	9/0	1	9/65	9	0.00298851	1	0.00298851	up_regulated
BP	GO:0045069	regulation of viral genome replication	4	4/0	1	4/65	4	0.00298851	1	0.00298851	up_regulated
MF	GO:0038024	cargo receptor activity	4	4/0	1	4/66	4	0.00298851	1	0.00298851	up_regulated
BP	GO:2001237	negative regulation of extrinsic apoptotic signaling pathway	4	4/0	1	4/65	4	0.00525597	1	0.00525597	up_regulated
BP	GO:0098542	defense response to other organism	8	8/0	1	8/65	8	0.00553163	1	0.00553163	up_regulated
BP	GO:0019079	viral genome replication	5	4/1	0.8	4/65	4	0.00745495	0.843639	0.00745495	up_regulated
BP	GO:0071310	cellular response to organic substance	31	20/11	0.645161	20/65	20	0.00852823	0.884375	0.00852823	up_regulated
BP	GO:2001234	negative regulation of apoptotic signaling pathway	5	5/0	1	5/65	5	0.00922276	1	0.00922276	up_regulated
BP	GO:0097191	extrinsic apoptotic signaling pathway	5	5/0	1	5/65	5	0.0101351	1	0.0101351	up_regulated
BP	GO:0050918	positive chemotaxis	3	3/0	1	3/65	3	0.0103989	1	0.0103989	up_regulated
BP	GO:0051412	response to corticosterone	3	0/3	1	3/65	3	1	0.0104648	0.0104648	down_regulated
BP	GO:0090280	positive regulation of calcium ion import	2	2/0	1	2/65	2	0.0132582	1	0.0132582	up_regulated
BP	GO:0006955	immune response	23	17/6	0.73913	17/65	17	0.0133773	1	0.0133773	up_regulated
BP	GO:0006897	endocytosis	11	9/2	0.818182	9/65	9	0.0135214	1	0.0135214	up_regulated
BP	GO:2001269	positive regulation of cysteine-type endopeptidase activity involved in apoptotic signaling pathway	2	2/0	1	2/65	2	0.0137641	1	0.0137641	up_regulated
BP	GO:2001236	regulation of extrinsic apoptotic signaling pathway	4	4/0	1	4/65	4	0.0174449	1	0.0174449	up_regulated
BP	GO:2001233	regulation of apoptotic signaling pathway	6	6/0	1	6/65	6	0.0187927	1	0.0187927	up_regulated
BP	GO:2001267	regulation of cysteine-type endopeptidase activity involved in apoptotic signaling pathway	2	2/0	1	2/65	2	0.0209228	1	0.0209228	up_regulated
BP	GO:0008625	extrinsic apoptotic signaling pathway via death domain receptors	3	3/0	1	3/65	3	0.0225848	1	0.0225848	up_regulated
BP	GO:0098657	import into cell	11	9/2	0.818182	9/65	9	0.0228312	1	0.0228312	up_regulated
BP	GO:0070887	cellular response to chemical stimulus	33	21/12	0.636364	21/65	21	0.0230094	1	0.0230094	up_regulated
BP	GO:0048245	eosinophil chemotaxis	2	2/0	1	2/65	2	0.0244156	1	0.0244156	up_regulated
BP	GO:0051385	response to mineralocorticoid	3	0/3	1	3/65	3	1	0.0252247	0.0252247	down_regulated
MF	GO:0070566	adenylyltransferase activity	2	2/0	1	2/66	2	0.0268473	1	0.0268473	up_regulated
MF	GO:0043236	laminin binding	2	2/0	1	2/66	2	0.028254	1	0.028254	up_regulated
BP	GO:0051707	response to other organism	10	9/1	0.9	9/65	9	0.0294261	1	0.0294261	up_regulated
BP	GO:0043207	response to external biotic stimulus	10	9/1	0.9	9/65	9	0.0294261	1	0.0294261	up_regulated
BP	GO:0032069	regulation of nuclease activity	2	2/0	1	2/65	2	0.0294261	1	0.0294261	up_regulated
BP	GO:0072677	eosinophil migration	2	2/0	1	2/65	2	0.0294261	1	0.0294261	up_regulated
BP	GO:1904037	positive regulation of epithelial cell apoptotic process	2	2/0	1	2/65	2	0.0319745	1	0.0319745	up_regulated
BP	GO:0098801	regulation of renal system process	3	2/1	0.666667	2/65	2	0.0333396	0.53533	0.0333396	up_regulated
BP	GO:0090279	regulation of calcium ion import	3	2/1	0.666667	2/65	2	0.0347087	0.541146	0.0347087	up_regulated
MF	GO:0042056	chemoattractant activity	2	2/0	1	2/66	2	0.0355284	1	0.0355284	up_regulated
BP	GO:0009607	response to biotic stimulus	10	9/1	0.9	9/65	9	0.0366533	1	0.0366533	up_regulated
BP	GO:0009605	response to external stimulus	23	16/7	0.695652	16/65	16	0.0383935	1	0.0383935	up_regulated
BP	GO:0003014	renal system process	4	3/1	0.75	3/65	3	0.0383935	0.839393	0.0383935	up_regulated
BP	GO:0043281	regulation of cysteine-type endopeptidase activity involved in apoptotic process	4	4/0	1	4/65	4	0.0383935	1	0.0383935	up_regulated
BP	GO:0010033	response to organic substance	31	20/11	0.645161	20/65	20	0.0443808	1	0.0443808	up_regulated
BP	GO:0002833	positive regulation of response to biotic stimulus	2	2/0	1	2/65	2	0.0455967	1	0.0455967	up_regulated
BP	GO:0032479	regulation of type I interferon production	3	3/0	1	3/65	3	0.0455967	1	0.0455967	up_regulated
CC	GO:0048471	perinuclear region of cytoplasm	8	7/1	0.875	7/68	7	0.0455967	1	0.0455967	up_regulated
BP	GO:0032606	type I interferon production	3	3/0	1	3/65	3	0.0456783	1	0.0456783	up_regulated
BP	GO:0002831	regulation of response to biotic stimulus	3	3/0	1	3/65	3	0.0472894	1	0.0472894	up_regulated
MF	GO:0048020	CCR chemokine receptor binding	2	2/0	1	2/66	2	0.0472894	1	0.0472894	up_regulated
BP	GO:0002252	immune effector process	13	10/3	0.769231	10/65	10	0.0485776	1	0.0485776	up_regulated
BP	GO:0043280	positive regulation of cysteine-type endopeptidase activity involved in apoptotic process	3	3/0	1	3/65	3	0.0485776	1	0.0485776	up_regulated

## Sheet: hcc
ONTOLOGY	ID	Description	Count	up_down	fraction_count_used	GeneRatio_used	count_used	p.adjust_up	p.adjust_down	p.adjust_min	pathway_tag
BP	GO:0019752	carboxylic acid metabolic process	122	19/103	0.844262	103/726	103	1	1.16747e-13	1.16747e-13	down_regulated
BP	GO:0006082	organic acid metabolic process	130	21/109	0.838462	109/726	109	1	1.506e-13	1.506e-13	down_regulated
BP	GO:0043436	oxoacid metabolic process	128	21/107	0.835938	107/726	107	1	2.57758e-13	2.57758e-13	down_regulated
BP	GO:0016054	organic acid catabolic process	46	3/43	0.934783	43/726	43	1	5.39683e-12	5.39683e-12	down_regulated
BP	GO:0046395	carboxylic acid catabolic process	46	3/43	0.934783	43/726	43	1	5.39683e-12	5.39683e-12	down_regulated
BP	GO:0032787	monocarboxylic acid metabolic process	79	12/67	0.848101	67/726	67	1	3.36443e-11	3.36443e-11	down_regulated
BP	GO:0044282	small molecule catabolic process	59	5/54	0.915254	54/726	54	1	3.36443e-11	3.36443e-11	down_regulated
BP	GO:0017144	drug metabolic process	94	16/78	0.829787	78/726	78	1	3.12867e-10	3.12867e-10	down_regulated
BP	GO:0044281	small molecule metabolic process	190	42/148	0.778947	148/726	148	1	1.38858e-08	1.38858e-08	down_regulated
BP	GO:1901605	alpha-amino acid metabolic process	36	3/33	0.916667	33/726	33	1	1.8146e-08	1.8146e-08	down_regulated
BP	GO:0019373	epoxygenase P450 pathway	11	0/11	1	11/726	11	1	1.85294e-08	1.85294e-08	down_regulated
BP	GO:1901606	alpha-amino acid catabolic process	23	1/22	0.956522	22/726	22	1	2.51086e-08	2.51086e-08	down_regulated
BP	GO:0009063	cellular amino acid catabolic process	25	2/23	0.92	23/726	23	1	5.06761e-08	5.06761e-08	down_regulated
BP	GO:0006805	xenobiotic metabolic process	24	1/23	0.958333	23/726	23	1	6.6765e-08	6.6765e-08	down_regulated
BP	GO:0042737	drug catabolic process	24	0/24	1	24/726	24	1	1.1238e-07	1.1238e-07	down_regulated
BP	GO:0008202	steroid metabolic process	46	8/38	0.826087	38/726	38	1	1.95794e-07	1.95794e-07	down_regulated
BP	GO:0046394	carboxylic acid biosynthetic process	55	10/45	0.818182	45/726	45	1	3.62823e-07	3.62823e-07	down_regulated
BP	GO:0072329	monocarboxylic acid catabolic process	23	0/23	1	23/726	23	1	3.62823e-07	3.62823e-07	down_regulated
BP	GO:0016053	organic acid biosynthetic process	55	10/45	0.818182	45/726	45	1	3.67826e-07	3.67826e-07	down_regulated
MF	GO:0008391	arachidonic acid monooxygenase activity	9	0/9	1	9/720	9	1	4.30638e-07	4.30638e-07	down_regulated
MF	GO:0008392	arachidonic acid epoxygenase activity	9	0/9	1	9/720	9	1	4.30638e-07	4.30638e-07	down_regulated
BP	GO:0071466	cellular response to xenobiotic stimulus	29	3/26	0.896552	26/726	26	1	8.4827e-07	8.4827e-07	down_regulated
BP	GO:1901615	organic hydroxy compound metabolic process	59	10/49	0.830508	49/726	49	1	9.59195e-07	9.59195e-07	down_regulated
MF	GO:0019825	oxygen binding	13	0/13	1	13/720	13	1	1.20675e-06	1.20675e-06	down_regulated
BP	GO:0055114	oxidation-reduction process	94	16/78	0.829787	78/726	78	1	1.35195e-06	1.35195e-06	down_regulated
BP	GO:0071280	cellular response to copper ion	10	0/10	1	10/726	10	1	1.48849e-06	1.48849e-06	down_regulated
BP	GO:0006631	fatty acid metabolic process	48	8/40	0.833333	40/726	40	1	1.71989e-06	1.71989e-06	down_regulated
BP	GO:0010273	detoxification of copper ion	8	0/8	1	8/726	8	1	2.15582e-06	2.15582e-06	down_regulated
BP	GO:1990169	stress response to copper ion	8	0/8	1	8/726	8	1	2.15582e-06	2.15582e-06	down_regulated
MF	GO:0048037	cofactor binding	54	7/47	0.87037	47/720	47	1	3.14859e-06	3.14859e-06	down_regulated
MF	GO:0016491	oxidoreductase activity	75	13/62	0.826667	62/720	62	1	4.98086e-06	4.98086e-06	down_regulated
BP	GO:0009410	response to xenobiotic stimulus	37	5/32	0.864865	32/726	32	1	6.54447e-06	6.54447e-06	down_regulated
BP	GO:0061687	detoxification of inorganic compound	8	0/8	1	8/726	8	1	6.54447e-06	6.54447e-06	down_regulated
BP	GO:0097501	stress response to metal ion	8	0/8	1	8/726	8	1	6.54447e-06	6.54447e-06	down_regulated
BP	GO:0019369	arachidonic acid metabolic process	15	2/13	0.866667	13/726	13	1	7.23606e-06	7.23606e-06	down_regulated
BP	GO:0006520	cellular amino acid metabolic process	43	5/38	0.883721	38/726	38	1	7.67533e-06	7.67533e-06	down_regulated
BP	GO:0006066	alcohol metabolic process	44	9/35	0.795455	35/726	35	1	8.26892e-06	8.26892e-06	down_regulated
BP	GO:0042738	exogenous drug catabolic process	9	0/9	1	9/726	9	1	1.00774e-05	1.00774e-05	down_regulated
BP	GO:0044283	small molecule biosynthetic process	77	16/61	0.792208	61/726	61	1	1.2208e-05	1.2208e-05	down_regulated
CC	GO:0000779	condensed chromosome, centromeric region	21	21/0	1	21/753	21	1.25169e-05	1	1.25169e-05	up_regulated
MF	GO:0004497	monooxygenase activity	19	2/17	0.894737	17/720	17	1	2.77489e-05	2.77489e-05	down_regulated
BP	GO:1901568	fatty acid derivative metabolic process	27	5/22	0.814815	22/726	22	1	3.26858e-05	3.26858e-05	down_regulated
BP	GO:0016125	sterol metabolic process	26	5/21	0.807692	21/726	21	1	4.73197e-05	4.73197e-05	down_regulated
BP	GO:0000280	nuclear division	45	41/4	0.911111	41/726	41	5.0155e-05	1	5.0155e-05	up_regulated
BP	GO:0007059	chromosome segregation	39	38/1	0.974359	38/726	38	5.0155e-05	1	5.0155e-05	up_regulated
BP	GO:0098813	nuclear chromosome segregation	35	34/1	0.971429	34/726	34	5.0155e-05	1	5.0155e-05	up_regulated
BP	GO:0000819	sister chromatid segregation	30	29/1	0.966667	29/726	29	5.0155e-05	1	5.0155e-05	up_regulated
CC	GO:0000777	condensed chromosome kinetochore	18	18/0	1	18/753	18	5.0155e-05	1	5.0155e-05	up_regulated
MF	GO:0020037	heme binding	19	0/19	1	19/720	19	1	5.45375e-05	5.45375e-05	down_regulated
BP	GO:0071294	cellular response to zinc ion	8	0/8	1	8/726	8	1	5.46189e-05	5.46189e-05	down_regulated
BP	GO:0071276	cellular response to cadmium ion	11	1/10	0.909091	10/726	10	1	5.85299e-05	5.85299e-05	down_regulated
BP	GO:0098754	detoxification	21	3/18	0.857143	18/726	18	1	5.9736e-05	5.9736e-05	down_regulated
BP	GO:0000070	mitotic sister chromatid segregation	23	22/1	0.956522	22/726	22	6.25959e-05	1	6.25959e-05	up_regulated
BP	GO:0006882	cellular zinc ion homeostasis	11	1/10	0.909091	10/726	10	1	7.32695e-05	7.32695e-05	down_regulated
BP	GO:0010043	response to zinc ion	12	0/12	1	12/726	12	1	7.49985e-05	7.49985e-05	down_regulated
BP	GO:0006690	icosanoid metabolic process	19	2/17	0.894737	17/726	17	1	8.00063e-05	8.00063e-05	down_regulated
BP	GO:0016042	lipid catabolic process	40	8/32	0.8	32/726	32	1	0.000109326	0.000109326	down_regulated
BP	GO:0046688	response to copper ion	12	2/10	0.833333	10/726	10	1	0.000110217	0.000110217	down_regulated
BP	GO:0055069	zinc ion homeostasis	11	1/10	0.909091	10/726	10	1	0.000110217	0.000110217	down_regulated
BP	GO:0001676	long-chain fatty acid metabolic process	20	4/16	0.8	16/726	16	1	0.000119254	0.000119254	down_regulated
BP	GO:0034308	primary alcohol metabolic process	14	2/12	0.857143	12/726	12	1	0.000119357	0.000119357	down_regulated
BP	GO:0033559	unsaturated fatty acid metabolic process	19	3/16	0.842105	16/726	16	1	0.000129309	0.000129309	down_regulated
MF	GO:0046906	tetrapyrrole binding	20	1/19	0.95	19/720	19	1	0.000129309	0.000129309	down_regulated
BP	GO:0042133	neurotransmitter metabolic process	21	2/19	0.904762	19/726	19	1	0.000131474	0.000131474	down_regulated
BP	GO:0072330	monocarboxylic acid biosynthetic process	36	6/30	0.833333	30/726	30	1	0.000144956	0.000144956	down_regulated
BP	GO:0140014	mitotic nuclear division	34	30/4	0.882353	30/726	30	0.000145498	1	0.000145498	up_regulated
BP	GO:0048285	organelle fission	48	42/6	0.875	42/726	42	0.000178723	1	0.000178723	up_regulated
MF	GO:0008395	steroid hydroxylase activity	9	0/9	1	9/720	9	1	0.000228937	0.000228937	down_regulated
MF	GO:0016705	oxidoreductase activity, acting on paired donors, with incorporation or reduction of molecular oxygen	22	2/20	0.909091	20/720	20	1	0.00024258	0.00024258	down_regulated
CC	GO:0000776	kinetochore	19	19/0	1	19/753	19	0.000255212	1	0.000255212	up_regulated
BP	GO:0006957	complement activation, alternative pathway	6	0/6	1	6/726	6	1	0.000280177	0.000280177	down_regulated
MF	GO:0005506	iron ion binding	21	1/20	0.952381	20/720	20	1	0.000283187	0.000283187	down_regulated
BP	GO:1901616	organic hydroxy compound catabolic process	14	2/12	0.857143	12/726	12	1	0.000293617	0.000293617	down_regulated
MF	GO:0050662	coenzyme binding	31	3/28	0.903226	28/720	28	1	0.000309241	0.000309241	down_regulated
BP	GO:0009074	aromatic amino acid family catabolic process	7	0/7	1	7/726	7	1	0.000332583	0.000332583	down_regulated
CC	GO:0000793	condensed chromosome	25	25/0	1	25/753	25	0.000342437	1	0.000342437	up_regulated
BP	GO:0009072	aromatic amino acid family metabolic process	8	0/8	1	8/726	8	1	0.000378399	0.000378399	down_regulated
BP	GO:0044242	cellular lipid catabolic process	29	6/23	0.793103	23/726	23	1	0.000386974	0.000386974	down_regulated
BP	GO:0051983	regulation of chromosome segregation	17	16/1	0.941176	16/726	16	0.000403453	1	0.000403453	up_regulated
CC	GO:0000775	chromosome, centromeric region	23	23/0	1	23/753	23	0.000448118	1	0.000448118	up_regulated
BP	GO:1902652	secondary alcohol metabolic process	23	5/18	0.782609	18/726	18	1	0.000458714	0.000458714	down_regulated
BP	GO:0006569	tryptophan catabolic process	5	0/5	1	5/726	5	1	0.000552591	0.000552591	down_regulated
BP	GO:0042436	indole-containing compound catabolic process	5	0/5	1	5/726	5	1	0.000552591	0.000552591	down_regulated
BP	GO:0046218	indolalkylamine catabolic process	5	0/5	1	5/726	5	1	0.000552591	0.000552591	down_regulated
BP	GO:0042402	cellular biogenic amine catabolic process	7	0/7	1	7/726	7	1	0.000580977	0.000580977	down_regulated
MF	GO:0016712	oxidoreductase activity, acting on paired donors, with incorporation or reduction of molecular oxygen, reduced flavin or flavoprotein as one donor, and incorporation of one atom of oxygen	8	0/8	1	8/720	8	1	0.000580977	0.000580977	down_regulated
BP	GO:0043648	dicarboxylic acid metabolic process	18	3/15	0.833333	15/726	15	1	0.000758246	0.000758246	down_regulated
BP	GO:0042445	hormone metabolic process	25	2/23	0.92	23/726	23	1	0.000789608	0.000789608	down_regulated
BP	GO:0008203	cholesterol metabolic process	22	5/17	0.772727	17/726	17	1	0.00082832	0.00082832	down_regulated
BP	GO:0009435	NAD biosynthetic process	10	0/10	1	10/726	10	1	0.000889144	0.000889144	down_regulated
BP	GO:0051186	cofactor metabolic process	58	14/44	0.758621	44/726	44	1	0.00089628	0.00089628	down_regulated
BP	GO:0006732	coenzyme metabolic process	44	11/33	0.75	33/726	33	1	0.000916494	0.000916494	down_regulated
BP	GO:0042136	neurotransmitter biosynthetic process	16	2/14	0.875	14/726	14	1	0.000924312	0.000924312	down_regulated
BP	GO:0009310	amine catabolic process	7	0/7	1	7/726	7	1	0.000955421	0.000955421	down_regulated
MF	GO:0016614	oxidoreductase activity, acting on CH-OH group of donors	20	3/17	0.85	17/720	17	1	0.000989111	0.000989111	down_regulated
BP	GO:0046686	response to cadmium ion	14	3/11	0.785714	11/726	11	1	0.00102933	0.00102933	down_regulated
BP	GO:0097164	ammonium ion metabolic process	25	4/21	0.84	21/726	21	1	0.00131484	0.00131484	down_regulated
BP	GO:0051301	cell division	53	48/5	0.90566	48/726	48	0.00132029	1	0.00132029	up_regulated
BP	GO:0034754	cellular hormone metabolic process	17	2/15	0.882353	15/726	15	1	0.00133758	0.00133758	down_regulated
BP	GO:0001867	complement activation, lectin pathway	5	0/5	1	5/726	5	1	0.00133758	0.00133758	down_regulated
BP	GO:0006568	tryptophan metabolic process	5	0/5	1	5/726	5	1	0.00133758	0.00133758	down_regulated
CC	GO:0034364	high-density lipoprotein particle	7	0/7	1	7/753	7	1	0.00133758	0.00133758	down_regulated
BP	GO:0071248	cellular response to metal ion	22	4/18	0.818182	18/726	18	1	0.00136333	0.00136333	down_regulated
BP	GO:0008652	cellular amino acid biosynthetic process	15	3/12	0.8	12/726	12	1	0.0019672	0.0019672	down_regulated
CC	GO:0060205	cytoplasmic vesicle lumen	40	11/29	0.725	29/753	29	1	0.0019672	0.0019672	down_regulated
BP	GO:0072525	pyridine-containing compound biosynthetic process	18	2/16	0.888889	16/726	16	1	0.00198722	0.00198722	down_regulated
CC	GO:0031983	vesicle lumen	40	11/29	0.725	29/753	29	1	0.00202649	0.00202649	down_regulated
CC	GO:0005819	spindle	31	30/1	0.967742	30/753	30	0.00222354	1	0.00222354	up_regulated
CC	GO:0042827	platelet dense granule	8	2/6	0.75	6/753	6	1	0.00224536	0.00224536	down_regulated
CC	GO:0034358	plasma lipoprotein particle	8	0/8	1	8/753	8	1	0.00224536	0.00224536	down_regulated
CC	GO:1990777	lipoprotein particle	8	0/8	1	8/753	8	1	0.00224536	0.00224536	down_regulated
BP	GO:0009636	response to toxic substance	50	11/39	0.78	39/726	39	1	0.00224602	0.00224602	down_regulated
BP	GO:0019674	NAD metabolic process	11	0/11	1	11/726	11	1	0.00231222	0.00231222	down_regulated
BP	GO:0051783	regulation of nuclear division	25	21/4	0.84	21/726	21	0.00232618	1	0.00232618	up_regulated
MF	GO:0008483	transaminase activity	7	1/6	0.857143	6/720	6	1	0.00240525	0.00240525	down_regulated
BP	GO:0006067	ethanol metabolic process	6	0/6	1	6/726	6	1	0.00241206	0.00241206	down_regulated
CC	GO:0031089	platelet dense granule lumen	6	1/5	0.833333	5/753	5	1	0.00243803	0.00243803	down_regulated
BP	GO:0042632	cholesterol homeostasis	12	1/11	0.916667	11/726	11	1	0.00250176	0.00250176	down_regulated
BP	GO:0055092	sterol homeostasis	12	1/11	0.916667	11/726	11	1	0.00250176	0.00250176	down_regulated
BP	GO:0009062	fatty acid catabolic process	14	0/14	1	14/726	14	1	0.00254268	0.00254268	down_regulated
BP	GO:0016999	antibiotic metabolic process	20	4/16	0.8	16/726	16	1	0.00292863	0.00292863	down_regulated
CC	GO:0032994	protein-lipid complex	8	0/8	1	8/753	8	1	0.00294141	0.00294141	down_regulated
BP	GO:0002526	acute inflammatory response	23	2/21	0.913043	21/726	21	1	0.00331241	0.00331241	down_regulated
BP	GO:0055076	transition metal ion homeostasis	19	3/16	0.842105	16/726	16	1	0.0033299	0.0033299	down_regulated
BP	GO:0019395	fatty acid oxidation	13	0/13	1	13/726	13	1	0.0033299	0.0033299	down_regulated
BP	GO:0006629	lipid metabolic process	112	26/86	0.767857	86/726	86	1	0.00337861	0.00337861	down_regulated
MF	GO:0016769	transferase activity, transferring nitrogenous groups	7	1/6	0.857143	6/720	6	1	0.00372024	0.00372024	down_regulated
BP	GO:0042537	benzene-containing compound metabolic process	6	0/6	1	6/726	6	1	0.00373418	0.00373418	down_regulated
BP	GO:0034440	lipid oxidation	13	0/13	1	13/726	13	1	0.00390934	0.00390934	down_regulated
BP	GO:0019359	nicotinamide nucleotide biosynthetic process	17	2/15	0.882353	15/726	15	1	0.00405278	0.00405278	down_regulated
BP	GO:0019363	pyridine nucleotide biosynthetic process	17	2/15	0.882353	15/726	15	1	0.00405278	0.00405278	down_regulated
MF	GO:0031406	carboxylic acid binding	23	4/19	0.826087	19/720	19	1	0.00405278	0.00405278	down_regulated
BP	GO:0008608	attachment of spindle microtubules to kinetochore	8	8/0	1	8/726	8	0.00410727	1	0.00410727	up_regulated
BP	GO:0006576	cellular biogenic amine metabolic process	9	0/9	1	9/726	9	1	0.00440757	0.00440757	down_regulated
MF	GO:0043177	organic acid binding	24	5/19	0.791667	19/720	19	1	0.00453775	0.00453775	down_regulated
BP	GO:0031577	spindle checkpoint	9	8/1	0.888889	8/726	8	0.00489126	1	0.00489126	up_regulated
BP	GO:0010965	regulation of mitotic sister chromatid separation	11	10/1	0.909091	10/726	10	0.00506106	1	0.00506106	up_regulated
BP	GO:2000816	negative regulation of mitotic sister chromatid separation	9	8/1	0.888889	8/726	8	0.00550251	1	0.00550251	up_regulated
CC	GO:0098687	chromosomal region	30	30/0	1	30/753	30	0.00569296	1	0.00569296	up_regulated
BP	GO:1905819	negative regulation of chromosome separation	9	8/1	0.888889	8/726	8	0.00593212	1	0.00593212	up_regulated
BP	GO:0051306	mitotic sister chromatid separation	11	10/1	0.909091	10/726	10	0.00593212	1	0.00593212	up_regulated
BP	GO:0071241	cellular response to inorganic substance	24	6/18	0.75	18/726	18	1	0.00616587	0.00616587	down_regulated
BP	GO:0006586	indolalkylamine metabolic process	5	0/5	1	5/726	5	1	0.00625993	0.00625993	down_regulated
BP	GO:0009070	serine family amino acid biosynthetic process	5	0/5	1	5/726	5	1	0.00625993	0.00625993	down_regulated
BP	GO:0032496	response to lipopolysaccharide	33	6/27	0.818182	27/726	27	1	0.00628331	0.00628331	down_regulated
MF	GO:0016725	oxidoreductase activity, acting on CH or CH2 groups	5	1/4	0.8	4/720	4	1	0.00628331	0.00628331	down_regulated
BP	GO:0006809	nitric oxide biosynthetic process	12	2/10	0.833333	10/726	10	1	0.00632836	0.00632836	down_regulated
BP	GO:0006954	inflammatory response	65	14/51	0.784615	51/726	51	1	0.00639409	0.00639409	down_regulated
BP	GO:0002237	response to molecule of bacterial origin	34	6/28	0.823529	28/726	28	1	0.00639409	0.00639409	down_regulated
BP	GO:0051304	chromosome separation	13	12/1	0.923077	12/726	12	0.00656183	1	0.00656183	up_regulated
BP	GO:0072376	protein activation cascade	20	2/18	0.9	18/726	18	1	0.00659692	0.00659692	down_regulated
BP	GO:1903047	mitotic cell cycle process	71	59/12	0.830986	59/726	59	0.0066141	1	0.0066141	up_regulated
BP	GO:0007088	regulation of mitotic nuclear division	22	18/4	0.818182	18/726	18	0.0066141	1	0.0066141	up_regulated
BP	GO:0033048	negative regulation of mitotic sister chromatid segregation	9	8/1	0.888889	8/726	8	0.0066141	1	0.0066141	up_regulated
BP	GO:0051784	negative regulation of nuclear division	11	10/1	0.909091	10/726	10	0.0066141	1	0.0066141	up_regulated
BP	GO:1905818	regulation of chromosome separation	11	10/1	0.909091	10/726	10	0.0066141	1	0.0066141	up_regulated
BP	GO:0030071	regulation of mitotic metaphase/anaphase transition	10	9/1	0.9	9/726	9	0.0066141	1	0.0066141	up_regulated
BP	GO:0045839	negative regulation of mitotic nuclear division	10	9/1	0.9	9/726	9	0.0066141	1	0.0066141	up_regulated
BP	GO:0006706	steroid catabolic process	7	1/6	0.857143	6/726	6	1	0.00665505	0.00665505	down_regulated
BP	GO:0044262	cellular carbohydrate metabolic process	25	2/23	0.92	23/726	23	1	0.00665505	0.00665505	down_regulated
CC	GO:0046930	pore complex	6	1/5	0.833333	5/753	5	1	0.00708811	0.00708811	down_regulated
BP	GO:1902099	regulation of metaphase/anaphase transition of cell cycle	10	9/1	0.9	9/726	9	0.00747775	1	0.00747775	up_regulated
MF	GO:0004745	retinol dehydrogenase activity	6	1/5	0.833333	5/720	5	1	0.00765432	0.00765432	down_regulated
BP	GO:0006071	glycerol metabolic process	5	0/5	1	5/726	5	1	0.00767804	0.00767804	down_regulated
BP	GO:0010038	response to metal ion	37	10/27	0.72973	27/726	27	1	0.00804408	0.00804408	down_regulated
BP	GO:0046164	alcohol catabolic process	10	2/8	0.8	8/726	8	1	0.00815746	0.00815746	down_regulated
BP	GO:0006953	acute-phase response	8	0/8	1	8/726	8	1	0.00815746	0.00815746	down_regulated
BP	GO:0007093	mitotic cell cycle checkpoint	19	18/1	0.947368	18/726	18	0.00818025	1	0.00818025	up_regulated
BP	GO:0015711	organic anion transport	44	10/34	0.772727	34/726	34	1	0.00845607	0.00845607	down_regulated
BP	GO:0009071	serine family amino acid catabolic process	4	0/4	1	4/726	4	1	0.00845607	0.00845607	down_regulated
BP	GO:0034372	very-low-density lipoprotein particle remodeling	4	0/4	1	4/726	4	1	0.00845607	0.00845607	down_regulated
BP	GO:0035747	natural killer cell chemotaxis	4	0/4	1	4/726	4	1	0.00845607	0.00845607	down_regulated
MF	GO:0050786	RAGE receptor binding	5	1/4	0.8	4/720	4	1	0.00845607	0.00845607	down_regulated
BP	GO:0046209	nitric oxide metabolic process	12	2/10	0.833333	10/726	10	1	0.00871443	0.00871443	down_regulated
BP	GO:0009064	glutamine family amino acid metabolic process	11	1/10	0.909091	10/726	10	1	0.00871443	0.00871443	down_regulated
BP	GO:0033046	negative regulation of sister chromatid segregation	9	8/1	0.888889	8/726	8	0.00881919	1	0.00881919	up_regulated
BP	GO:0007094	mitotic spindle assembly checkpoint	8	7/1	0.875	7/726	7	0.00898352	1	0.00898352	up_regulated
BP	GO:0071173	spindle assembly checkpoint	8	7/1	0.875	7/726	7	0.00898352	1	0.00898352	up_regulated
BP	GO:0071174	mitotic spindle checkpoint	8	7/1	0.875	7/726	7	0.00898352	1	0.00898352	up_regulated
BP	GO:0007091	metaphase/anaphase transition of mitotic cell cycle	10	9/1	0.9	9/726	9	0.00898352	1	0.00898352	up_regulated
BP	GO:0051985	negative regulation of chromosome segregation	9	8/1	0.888889	8/726	8	0.00921206	1	0.00921206	up_regulated
BP	GO:0043691	reverse cholesterol transport	5	0/5	1	5/726	5	1	0.00929544	0.00929544	down_regulated
BP	GO:0044784	metaphase/anaphase transition of cell cycle	10	9/1	0.9	9/726	9	0.00959692	1	0.00959692	up_regulated
BP	GO:0050727	regulation of inflammatory response	39	8/31	0.794872	31/726	31	1	0.00986604	0.00986604	down_regulated
BP	GO:0072524	pyridine-containing compound metabolic process	21	4/17	0.809524	17/726	17	1	0.00999038	0.00999038	down_regulated
BP	GO:0045841	negative regulation of mitotic metaphase/anaphase transition	8	7/1	0.875	7/726	7	0.0102829	1	0.0102829	up_regulated
BP	GO:0032892	positive regulation of organic acid transport	6	0/6	1	6/726	6	1	0.0109222	0.0109222	down_regulated
BP	GO:0033047	regulation of mitotic sister chromatid segregation	11	10/1	0.909091	10/726	10	0.0110369	1	0.0110369	up_regulated
BP	GO:1903046	meiotic cell cycle process	19	19/0	1	19/726	19	0.0110369	1	0.0110369	up_regulated
BP	GO:0140013	meiotic nuclear division	18	18/0	1	18/726	18	0.0110369	1	0.0110369	up_regulated
BP	GO:0009108	coenzyme biosynthetic process	28	7/21	0.75	21/726	21	1	0.0112746	0.0112746	down_regulated
BP	GO:0006081	cellular aldehyde metabolic process	12	2/10	0.833333	10/726	10	1	0.0112746	0.0112746	down_regulated
BP	GO:2001057	reactive nitrogen species metabolic process	12	2/10	0.833333	10/726	10	1	0.0112746	0.0112746	down_regulated
BP	GO:0005977	glycogen metabolic process	10	0/10	1	10/726	10	1	0.0112746	0.0112746	down_regulated
MF	GO:0016408	C-acyltransferase activity	5	0/5	1	5/720	5	1	0.0112746	0.0112746	down_regulated
BP	GO:0006069	ethanol oxidation	4	0/4	1	4/726	4	1	0.0113041	0.0113041	down_regulated
BP	GO:0009069	serine family amino acid metabolic process	7	0/7	1	7/726	7	1	0.0114731	0.0114731	down_regulated
BP	GO:1902100	negative regulation of metaphase/anaphase transition of cell cycle	8	7/1	0.875	7/726	7	0.0114735	1	0.0114735	up_regulated
BP	GO:0006112	energy reserve metabolic process	11	0/11	1	11/726	11	1	0.0118078	0.0118078	down_regulated
BP	GO:0006073	cellular glucan metabolic process	10	0/10	1	10/726	10	1	0.0120896	0.0120896	down_regulated
BP	GO:0044042	glucan metabolic process	10	0/10	1	10/726	10	1	0.0120896	0.0120896	down_regulated
BP	GO:0006323	DNA packaging	20	20/0	1	20/726	20	0.0132336	1	0.0132336	up_regulated
BP	GO:0055088	lipid homeostasis	15	2/13	0.866667	13/726	13	1	0.0133638	0.0133638	down_regulated
CC	GO:0034774	secretory granule lumen	35	10/25	0.714286	25/753	25	1	0.0133638	0.0133638	down_regulated
BP	GO:0009308	amine metabolic process	16	2/14	0.875	14/726	14	1	0.0134617	0.0134617	down_regulated
BP	GO:0019400	alditol metabolic process	5	0/5	1	5/726	5	1	0.0134952	0.0134952	down_regulated
BP	GO:0071498	cellular response to fluid shear stress	5	0/5	1	5/726	5	1	0.0134952	0.0134952	down_regulated
BP	GO:0051188	cofactor biosynthetic process	31	7/24	0.774194	24/726	24	1	0.0135011	0.0135011	down_regulated
MF	GO:0016616	oxidoreductase activity, acting on the CH-OH group of donors, NAD or NADP as acceptor	16	3/13	0.8125	13/720	13	1	0.0136595	0.0136595	down_regulated
MF	GO:0005539	glycosaminoglycan binding	23	4/19	0.826087	19/720	19	1	0.0138023	0.0138023	down_regulated
BP	GO:0000075	cell cycle checkpoint	22	21/1	0.954545	21/726	21	0.0139778	1	0.0139778	up_regulated
BP	GO:0045429	positive regulation of nitric oxide biosynthetic process	7	0/7	1	7/726	7	1	0.0142105	0.0142105	down_regulated
BP	GO:1904407	positive regulation of nitric oxide metabolic process	7	0/7	1	7/726	7	1	0.0142105	0.0142105	down_regulated
BP	GO:0006544	glycine metabolic process	4	0/4	1	4/726	4	1	0.0142105	0.0142105	down_regulated
BP	GO:0031650	regulation of heat generation	4	0/4	1	4/726	4	1	0.0142105	0.0142105	down_regulated
BP	GO:0034370	triglyceride-rich lipoprotein particle remodeling	4	0/4	1	4/726	4	1	0.0142105	0.0142105	down_regulated
BP	GO:0019748	secondary metabolic process	11	2/9	0.818182	9/726	9	1	0.0151765	0.0151765	down_regulated
BP	GO:0044255	cellular lipid metabolic process	85	20/65	0.764706	65/726	65	1	0.016104	0.016104	down_regulated
BP	GO:0006721	terpenoid metabolic process	16	4/12	0.75	12/726	12	1	0.016104	0.016104	down_regulated
BP	GO:0019362	pyridine nucleotide metabolic process	20	4/16	0.8	16/726	16	1	0.016104	0.016104	down_regulated
BP	GO:0046496	nicotinamide nucleotide metabolic process	20	4/16	0.8	16/726	16	1	0.016104	0.016104	down_regulated
MF	GO:0019842	vitamin binding	17	3/14	0.823529	14/720	14	1	0.016104	0.016104	down_regulated
BP	GO:0042447	hormone catabolic process	5	1/4	0.8	4/726	4	1	0.0180753	0.0180753	down_regulated
BP	GO:0043650	dicarboxylic acid biosynthetic process	5	1/4	0.8	4/726	4	1	0.0180753	0.0180753	down_regulated
BP	GO:0055090	acylglycerol homeostasis	6	0/6	1	6/726	6	1	0.0180753	0.0180753	down_regulated
BP	GO:0070328	triglyceride homeostasis	6	0/6	1	6/726	6	1	0.0180753	0.0180753	down_regulated
MF	GO:0010181	FMN binding	4	0/4	1	4/720	4	1	0.0180753	0.0180753	down_regulated
BP	GO:0051321	meiotic cell cycle	23	22/1	0.956522	22/726	22	0.0181334	1	0.0181334	up_regulated
BP	GO:0006641	triglyceride metabolic process	13	2/11	0.846154	11/726	11	1	0.0201325	0.0201325	down_regulated
BP	GO:0034501	protein localization to kinetochore	5	5/0	1	5/726	5	0.02027	1	0.02027	up_regulated
MF	GO:0035173	histone kinase activity	5	5/0	1	5/720	5	0.02027	1	0.02027	up_regulated
BP	GO:0051384	response to glucocorticoid	20	6/14	0.7	14/726	14	1	0.0203088	0.0203088	down_regulated
BP	GO:0046916	cellular transition metal ion homeostasis	15	3/12	0.8	12/726	12	1	0.0221961	0.0221961	down_regulated
BP	GO:0042430	indole-containing compound metabolic process	5	0/5	1	5/726	5	1	0.022271	0.022271	down_regulated
BP	GO:0034310	primary alcohol catabolic process	6	2/4	0.666667	4/726	4	0.791595	0.0229599	0.0229599	down_regulated
BP	GO:0006000	fructose metabolic process	4	0/4	1	4/726	4	1	0.0229599	0.0229599	down_regulated
BP	GO:0034356	NAD biosynthesis via nicotinamide riboside salvage pathway	4	0/4	1	4/726	4	1	0.0229599	0.0229599	down_regulated
BP	GO:0038065	collagen-activated signaling pathway	4	4/0	1	4/726	4	0.0230804	1	0.0230804	up_regulated
BP	GO:0007052	mitotic spindle organization	13	13/0	1	13/726	13	0.0230804	1	0.0230804	up_regulated
BP	GO:0010035	response to inorganic substance	55	20/35	0.636364	35/726	35	1	0.0233836	0.0233836	down_regulated
BP	GO:0006635	fatty acid beta-oxidation	9	0/9	1	9/726	9	1	0.0249252	0.0249252	down_regulated
CC	GO:0072562	blood microparticle	18	2/16	0.888889	16/753	16	1	0.0254805	0.0254805	down_regulated
BP	GO:0006730	one-carbon metabolic process	8	2/6	0.75	6/726	6	1	0.0268202	0.0268202	down_regulated
BP	GO:0030593	neutrophil chemotaxis	12	2/10	0.833333	10/726	10	1	0.0269043	0.0269043	down_regulated
BP	GO:0005978	glycogen biosynthetic process	7	0/7	1	7/726	7	1	0.0269043	0.0269043	down_regulated
BP	GO:0009250	glucan biosynthetic process	7	0/7	1	7/726	7	1	0.0269043	0.0269043	down_regulated
BP	GO:0002673	regulation of acute inflammatory response	15	1/14	0.933333	14/726	14	1	0.027667	0.027667	down_regulated
BP	GO:0019372	lipoxygenase pathway	4	0/4	1	4/726	4	1	0.0282665	0.0282665	down_regulated
BP	GO:1903409	reactive oxygen species biosynthetic process	13	2/11	0.846154	11/726	11	1	0.0293699	0.0293699	down_regulated
MF	GO:0008009	chemokine activity	10	3/7	0.7	7/720	7	1	0.0293699	0.0293699	down_regulated
CC	GO:0098644	complex of collagen trimers	5	5/0	1	5/753	5	0.029424	1	0.029424	up_regulated
CC	GO:0000778	condensed nuclear chromosome kinetochore	4	4/0	1	4/753	4	0.029426	1	0.029426	up_regulated
BP	GO:0033045	regulation of sister chromatid segregation	11	10/1	0.909091	10/726	10	0.0301843	1	0.0301843	up_regulated
BP	GO:1902850	microtubule cytoskeleton organization involved in mitosis	15	14/1	0.933333	14/726	14	0.0301843	1	0.0301843	up_regulated
BP	GO:0051988	regulation of attachment of spindle microtubules to kinetochore	4	4/0	1	4/726	4	0.0301843	1	0.0301843	up_regulated
CC	GO:0030496	midbody	17	16/1	0.941176	16/753	16	0.0306223	1	0.0306223	up_regulated
BP	GO:0000278	mitotic cell cycle	79	64/15	0.810127	64/726	64	0.0314329	1	0.0314329	up_regulated
BP	GO:0051303	establishment of chromosome localization	10	10/0	1	10/726	10	0.0314329	1	0.0314329	up_regulated
BP	GO:0007062	sister chromatid cohesion	14	14/0	1	14/726	14	0.0325935	1	0.0325935	up_regulated
CC	GO:0072686	mitotic spindle	11	11/0	1	11/753	11	0.0325935	1	0.0325935	up_regulated
BP	GO:0050000	chromosome localization	10	10/0	1	10/726	10	0.0331	1	0.0331	up_regulated
BP	GO:0034508	centromere complex assembly	8	8/0	1	8/726	8	0.0334266	1	0.0334266	up_regulated
BP	GO:0051383	kinetochore organization	5	5/0	1	5/726	5	0.0334266	1	0.0334266	up_regulated
CC	GO:0000940	condensed chromosome outer kinetochore	4	4/0	1	4/753	4	0.0336737	1	0.0336737	up_regulated
BP	GO:0000096	sulfur amino acid metabolic process	7	1/6	0.857143	6/726	6	1	0.0336984	0.0336984	down_regulated
BP	GO:0042417	dopamine metabolic process	6	0/6	1	6/726	6	1	0.0336984	0.0336984	down_regulated
BP	GO:0060612	adipose tissue development	6	0/6	1	6/726	6	1	0.0336984	0.0336984	down_regulated
BP	GO:0006577	amino-acid betaine metabolic process	4	0/4	1	4/726	4	1	0.0338738	0.0338738	down_regulated
BP	GO:0034375	high-density lipoprotein particle remodeling	4	0/4	1	4/726	4	1	0.0338738	0.0338738	down_regulated
MF	GO:0048038	quinone binding	5	1/4	0.8	4/720	4	1	0.0338738	0.0338738	down_regulated
MF	GO:0008329	signaling pattern recognition receptor activity	4	0/4	1	4/720	4	1	0.0338738	0.0338738	down_regulated
MF	GO:0016722	oxidoreductase activity, oxidizing metal ions	4	0/4	1	4/720	4	1	0.0338738	0.0338738	down_regulated
MF	GO:0038187	pattern recognition receptor activity	4	0/4	1	4/720	4	1	0.0338738	0.0338738	down_regulated
BP	GO:0006733	oxidoreduction coenzyme metabolic process	20	4/16	0.8	16/726	16	1	0.0351144	0.0351144	down_regulated
BP	GO:0031638	zymogen activation	7	0/7	1	7/726	7	1	0.0353186	0.0353186	down_regulated
BP	GO:0072593	reactive oxygen species metabolic process	23	3/20	0.869565	20/726	20	1	0.0353995	0.0353995	down_regulated
BP	GO:0009617	response to bacterium	46	8/38	0.826087	38/726	38	1	0.0354302	0.0354302	down_regulated
CC	GO:0000780	condensed nuclear chromosome, centromeric region	5	5/0	1	5/753	5	0.0369811	1	0.0369811	up_regulated
BP	GO:0050729	positive regulation of inflammatory response	15	3/12	0.8	12/726	12	1	0.037802	0.037802	down_regulated
BP	GO:0006006	glucose metabolic process	18	2/16	0.888889	16/726	16	1	0.037802	0.037802	down_regulated
BP	GO:0051289	protein homotetramerization	9	0/9	1	9/726	9	1	0.037802	0.037802	down_regulated
BP	GO:0006790	sulfur compound metabolic process	34	8/26	0.764706	26/726	26	1	0.038129	0.038129	down_regulated
BP	GO:0034368	protein-lipid complex remodeling	5	0/5	1	5/726	5	1	0.038129	0.038129	down_regulated
BP	GO:0034369	plasma lipoprotein particle remodeling	5	0/5	1	5/726	5	1	0.038129	0.038129	down_regulated
MF	GO:0005537	mannose binding	4	0/4	1	4/720	4	1	0.0396954	0.0396954	down_regulated
BP	GO:0071459	protein localization to chromosome, centromeric region	5	5/0	1	5/726	5	0.0399646	1	0.0399646	up_regulated
BP	GO:0001659	temperature homeostasis	6	0/6	1	6/726	6	1	0.0401221	0.0401221	down_regulated
BP	GO:0006091	generation of precursor metabolites and energy	42	9/33	0.785714	33/726	33	1	0.0403175	0.0403175	down_regulated
MF	GO:0008201	heparin binding	17	3/14	0.823529	14/720	14	1	0.0403175	0.0403175	down_regulated
BP	GO:0010906	regulation of glucose metabolic process	11	1/10	0.909091	10/726	10	1	0.040501	0.040501	down_regulated
BP	GO:0044106	cellular amine metabolic process	13	1/12	0.923077	12/726	12	1	0.0410008	0.0410008	down_regulated
BP	GO:1903428	positive regulation of reactive oxygen species biosynthetic process	7	0/7	1	7/726	7	1	0.0410008	0.0410008	down_regulated
BP	GO:0032602	chemokine production	11	2/9	0.818182	9/726	9	1	0.0421223	0.0421223	down_regulated
BP	GO:0005976	polysaccharide metabolic process	11	0/11	1	11/726	11	1	0.0422125	0.0422125	down_regulated
BP	GO:0006956	complement activation	15	1/14	0.933333	14/726	14	1	0.0423141	0.0423141	down_regulated
BP	GO:0034367	protein-containing complex remodeling	5	0/5	1	5/726	5	1	0.0423927	0.0423927	down_regulated
BP	GO:0009112	nucleobase metabolic process	8	2/6	0.75	6/726	6	1	0.0434186	0.0434186	down_regulated
MF	GO:0030170	pyridoxal phosphate binding	7	0/7	1	7/720	7	1	0.043428	0.043428	down_regulated
MF	GO:0070279	vitamin B6 binding	7	0/7	1	7/720	7	1	0.043428	0.043428	down_regulated
BP	GO:0031960	response to corticosteroid	22	8/14	0.636364	14/726	14	1	0.0437121	0.0437121	down_regulated
BP	GO:0002576	platelet degranulation	17	5/12	0.705882	12/726	12	1	0.0442069	0.0442069	down_regulated
BP	GO:0006720	isoprenoid metabolic process	16	4/12	0.75	12/726	12	1	0.0442069	0.0442069	down_regulated
BP	GO:0002638	negative regulation of immunoglobulin production	4	1/3	0.75	3/726	3	1	0.0442069	0.0442069	down_regulated
BP	GO:0007597	blood coagulation, intrinsic pathway	5	1/4	0.8	4/726	4	1	0.0442069	0.0442069	down_regulated
BP	GO:0030258	lipid modification	23	2/21	0.913043	21/726	21	1	0.0442069	0.0442069	down_regulated
BP	GO:0000098	sulfur amino acid catabolic process	3	0/3	1	3/726	3	1	0.0442069	0.0442069	down_regulated
BP	GO:0006570	tyrosine metabolic process	3	0/3	1	3/726	3	1	0.0442069	0.0442069	down_regulated
BP	GO:0042758	long-chain fatty acid catabolic process	3	0/3	1	3/726	3	1	0.0442069	0.0442069	down_regulated
BP	GO:0070189	kynurenine metabolic process	3	0/3	1	3/726	3	1	0.0442069	0.0442069	down_regulated
BP	GO:1901569	fatty acid derivative catabolic process	3	0/3	1	3/726	3	1	0.0442069	0.0442069	down_regulated
BP	GO:0019318	hexose metabolic process	21	3/18	0.857143	18/726	18	1	0.0453443	0.0453443	down_regulated
BP	GO:0034637	cellular carbohydrate biosynthetic process	9	0/9	1	9/726	9	1	0.0453443	0.0453443	down_regulated
MF	GO:0017046	peptide hormone binding	6	0/6	1	6/720	6	1	0.0453443	0.0453443	down_regulated
BP	GO:0042572	retinol metabolic process	6	1/5	0.833333	5/726	5	1	0.0453994	0.0453994	down_regulated
BP	GO:1903793	positive regulation of anion transport	6	0/6	1	6/726	6	1	0.0453994	0.0453994	down_regulated
MF	GO:0048029	monosaccharide binding	9	1/8	0.888889	8/720	8	1	0.0456667	0.0456667	down_regulated
BP	GO:0042180	cellular ketone metabolic process	23	5/18	0.782609	18/726	18	1	0.0479274	0.0479274	down_regulated
BP	GO:1990266	neutrophil migration	12	2/10	0.833333	10/726	10	1	0.0479274	0.0479274	down_regulated
BP	GO:0044264	cellular polysaccharide metabolic process	10	0/10	1	10/726	10	1	0.0479274	0.0479274	down_regulated
